# Supplementary material for: Shining the spotlight on the neglected: new high-quality genome assemblies as a gateway to understanding the evolution of Trypanosomatidae
Source: PubMed Central journal article supplement (PMC10441713; doi:10.1186/s12864-023-09591-z), 2023-08-21

**Additional file 6.** Violin plot representation of some for the 50 longest scaffolds for each genome assembly. Estimated scaffold somy is color-coded. Scaffold IDs and the ratio of median-of-means coverage values to the median genome coverage are shown on X and Y axes, respectively. Bar plot shows the median coverage value and interquartile range.

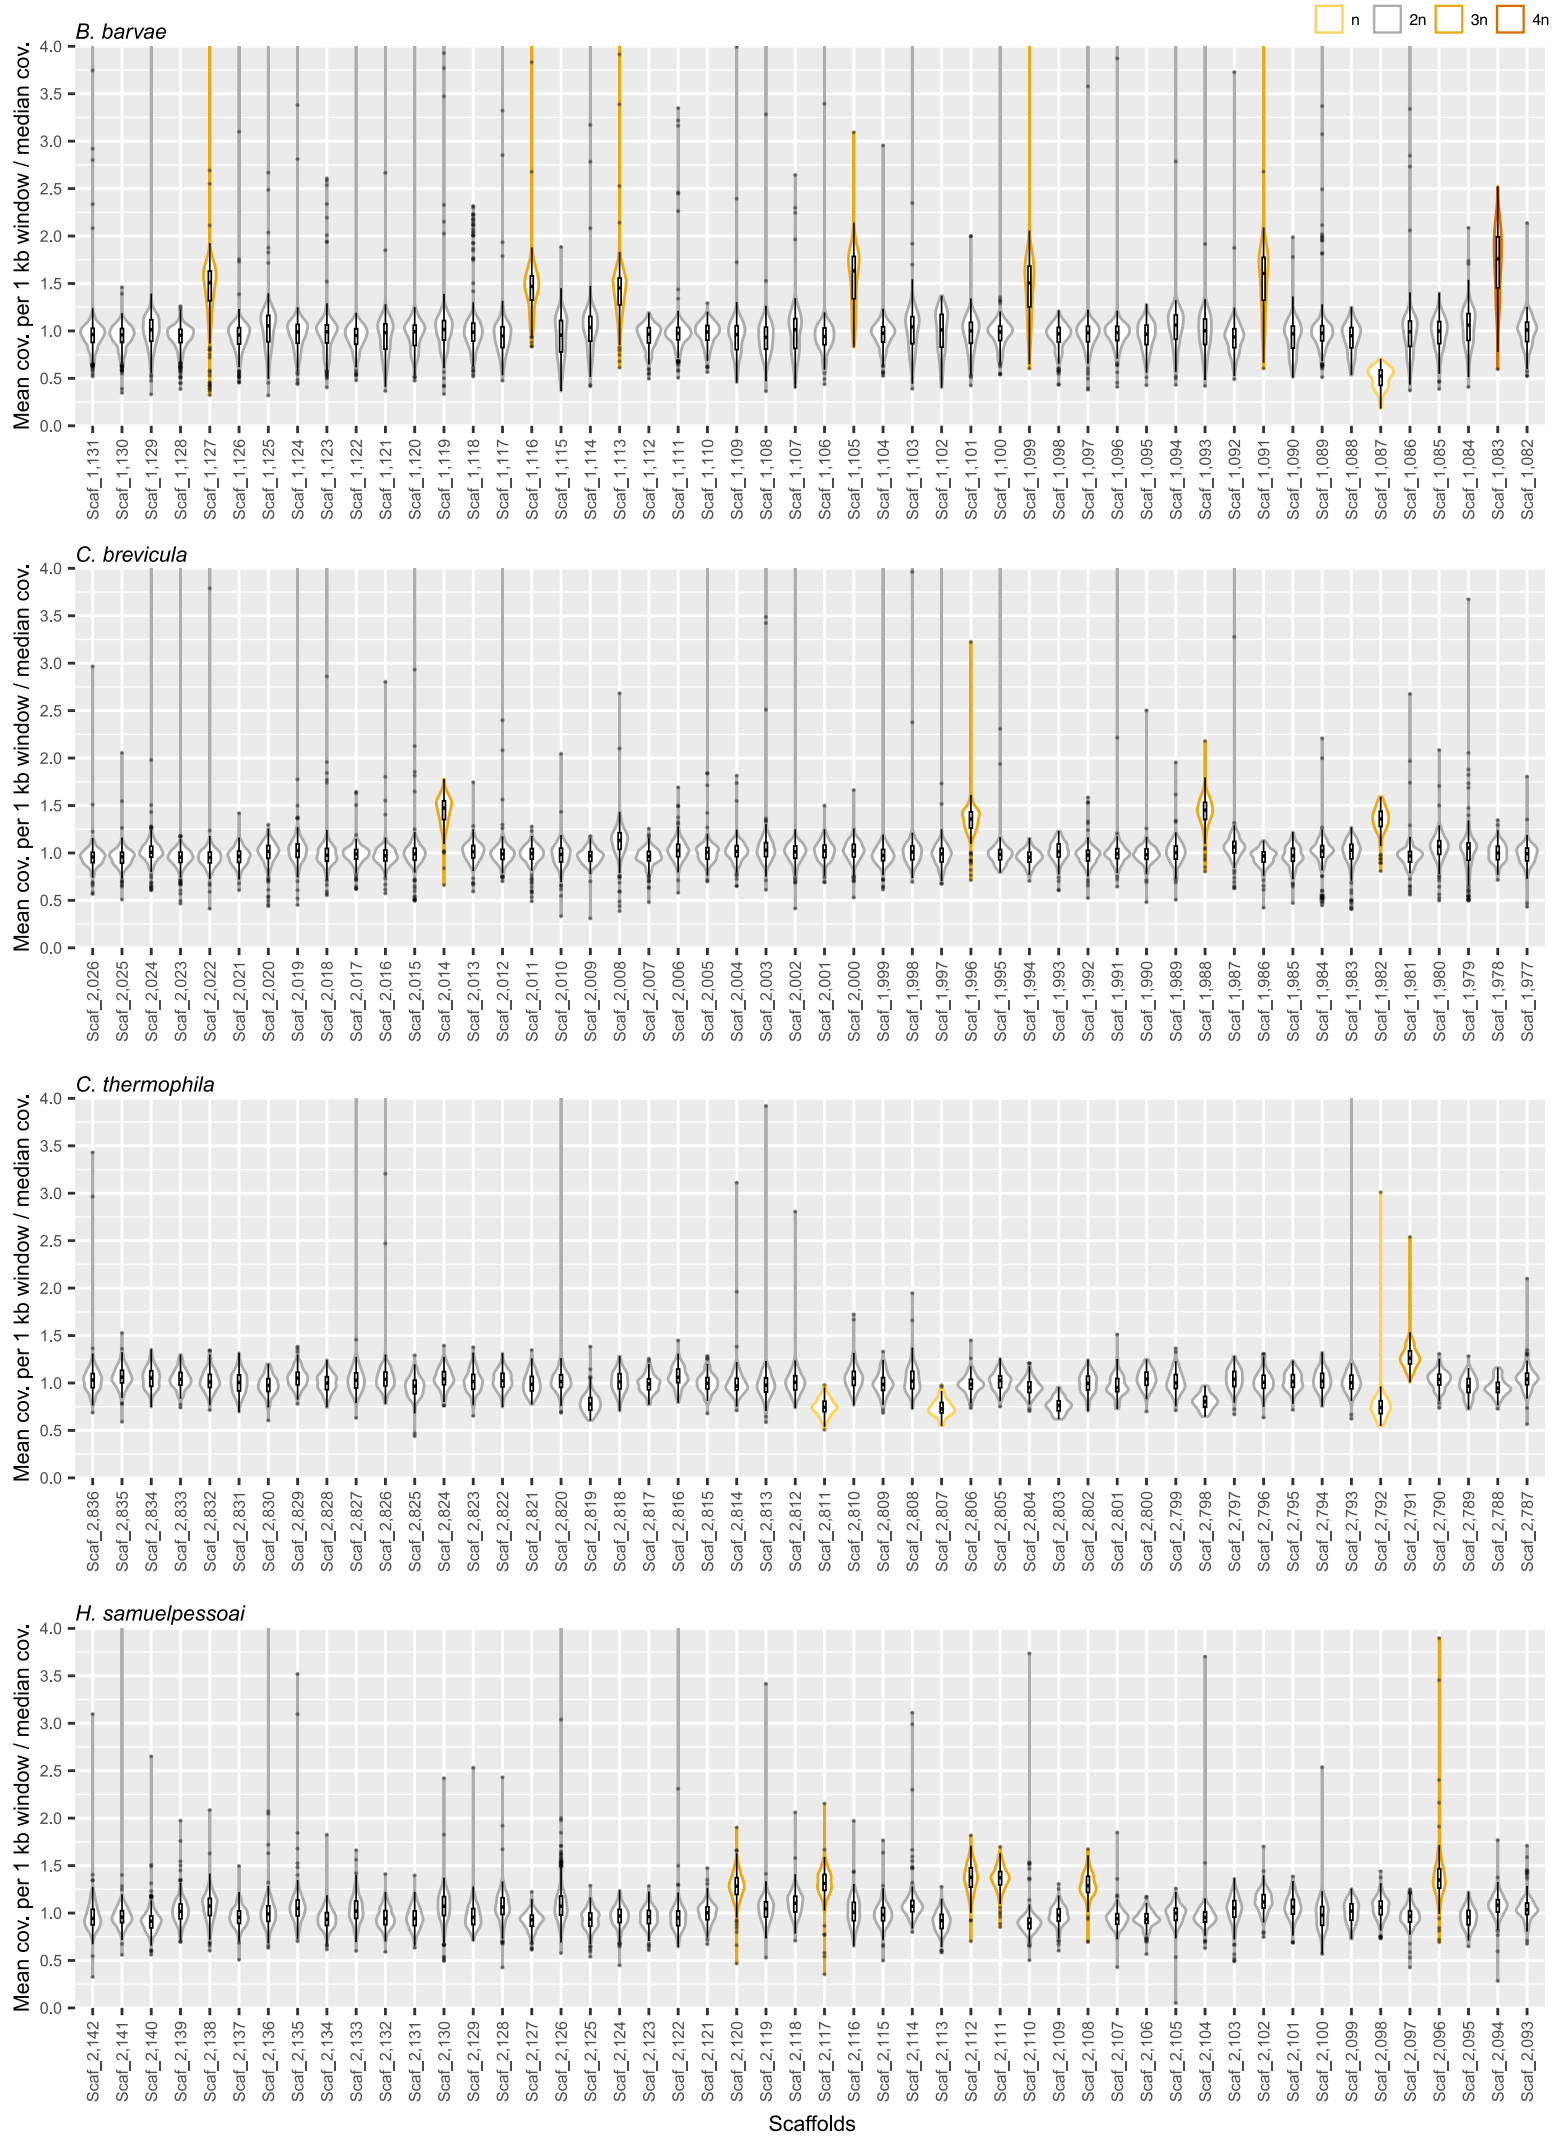

n 2n 4n

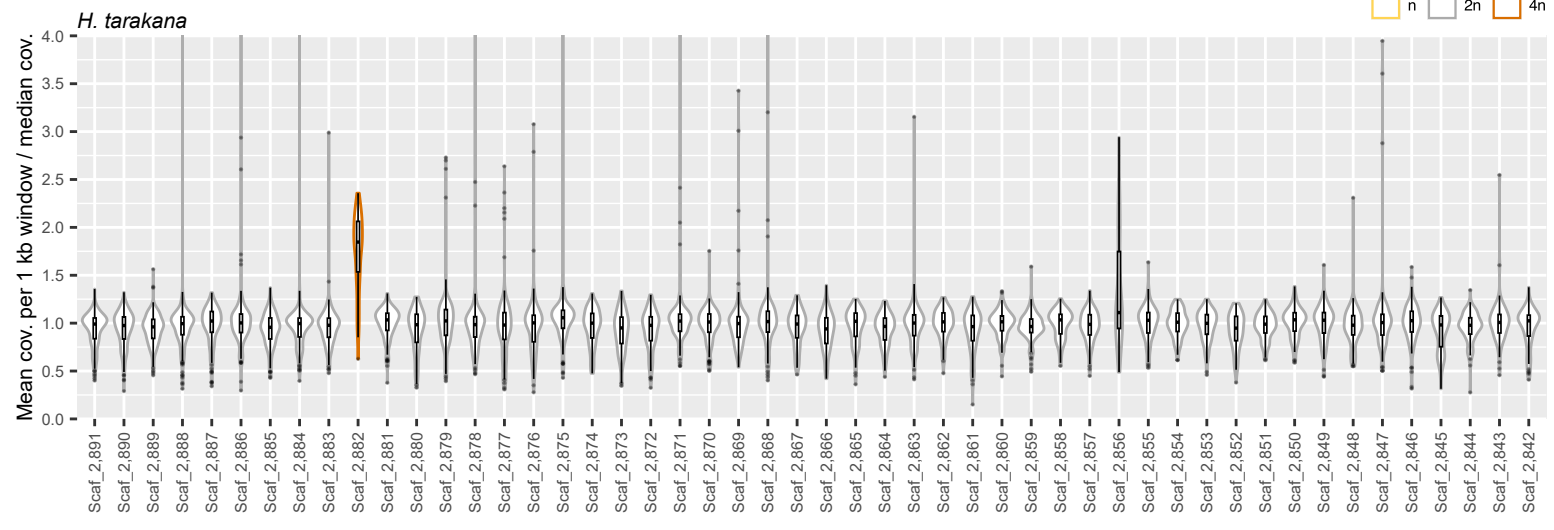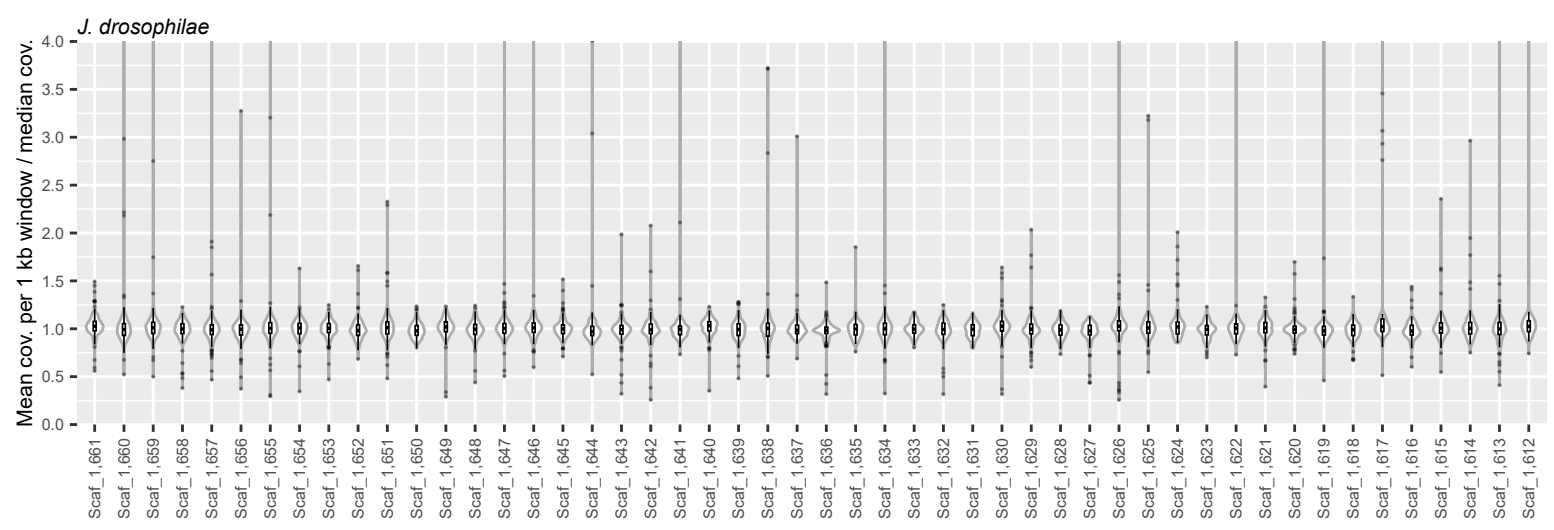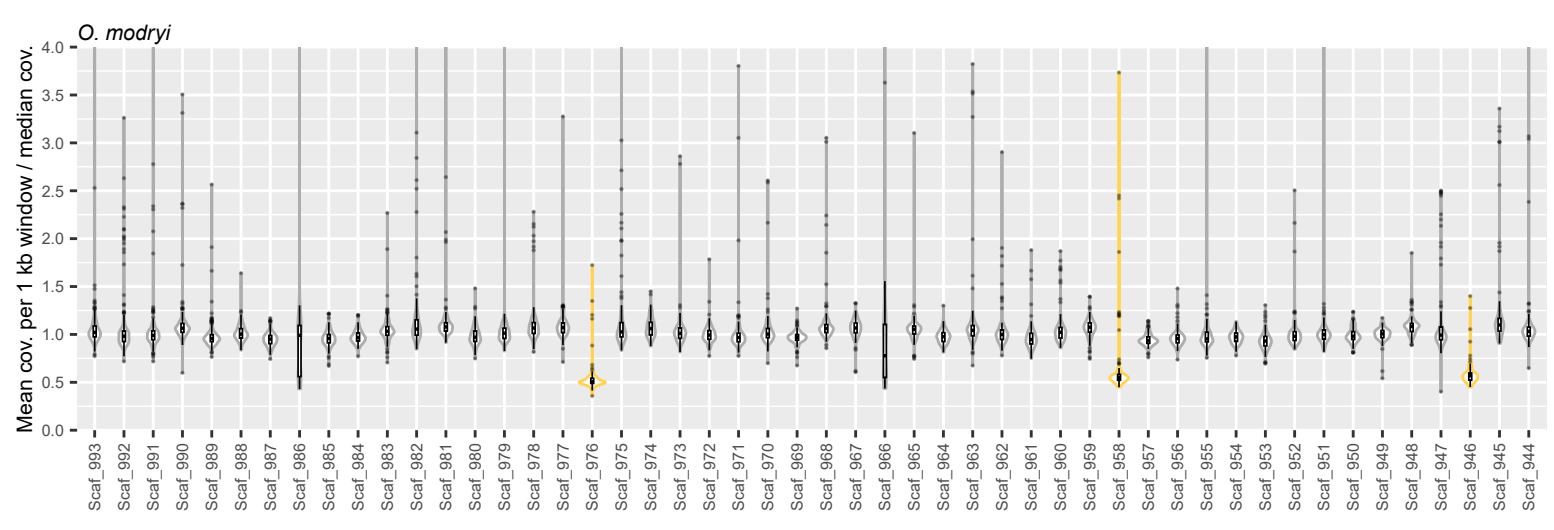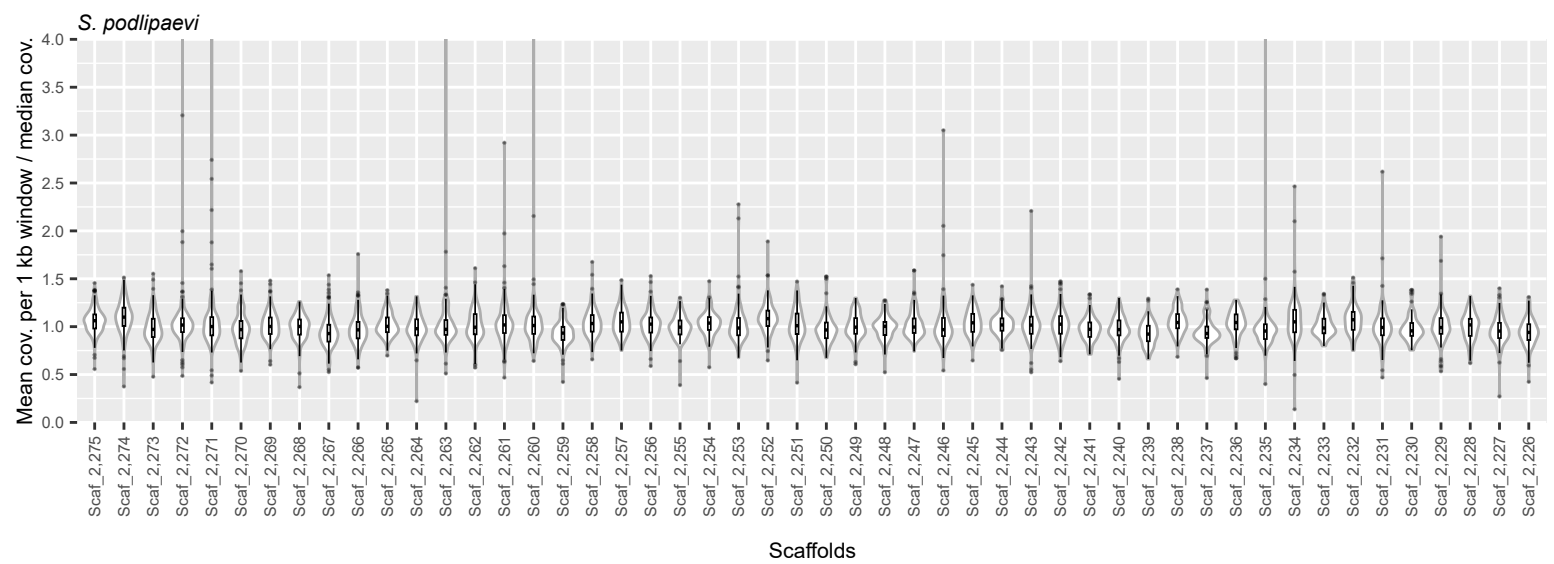

n 2n 3n 4n 5n

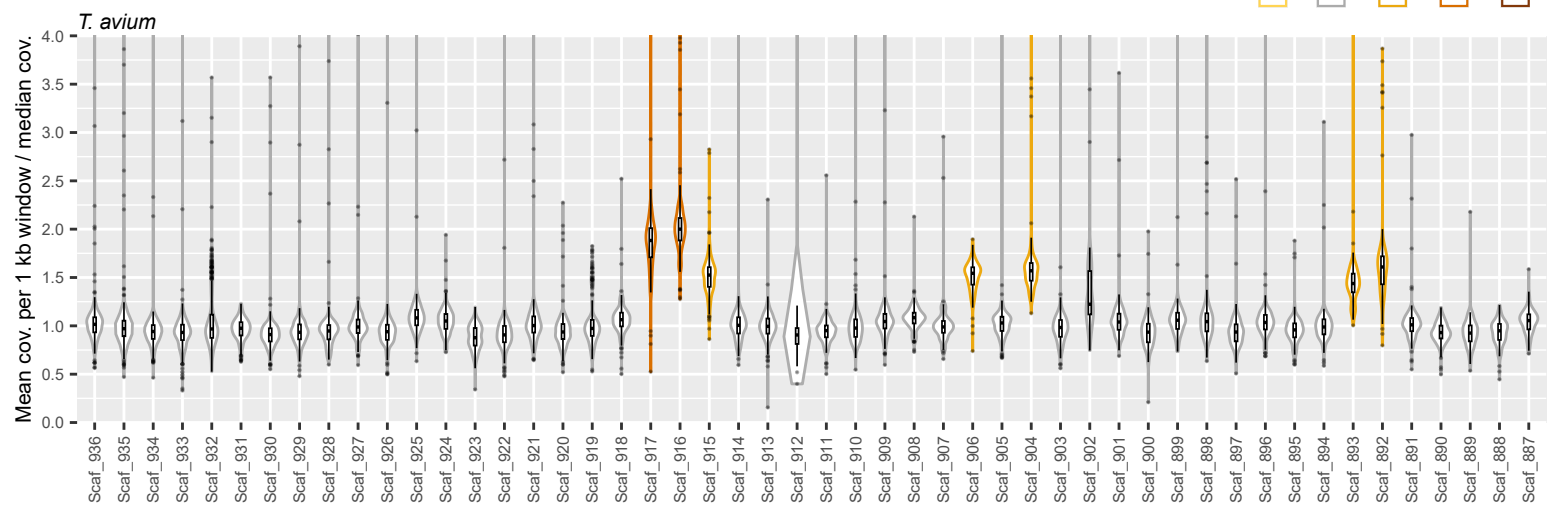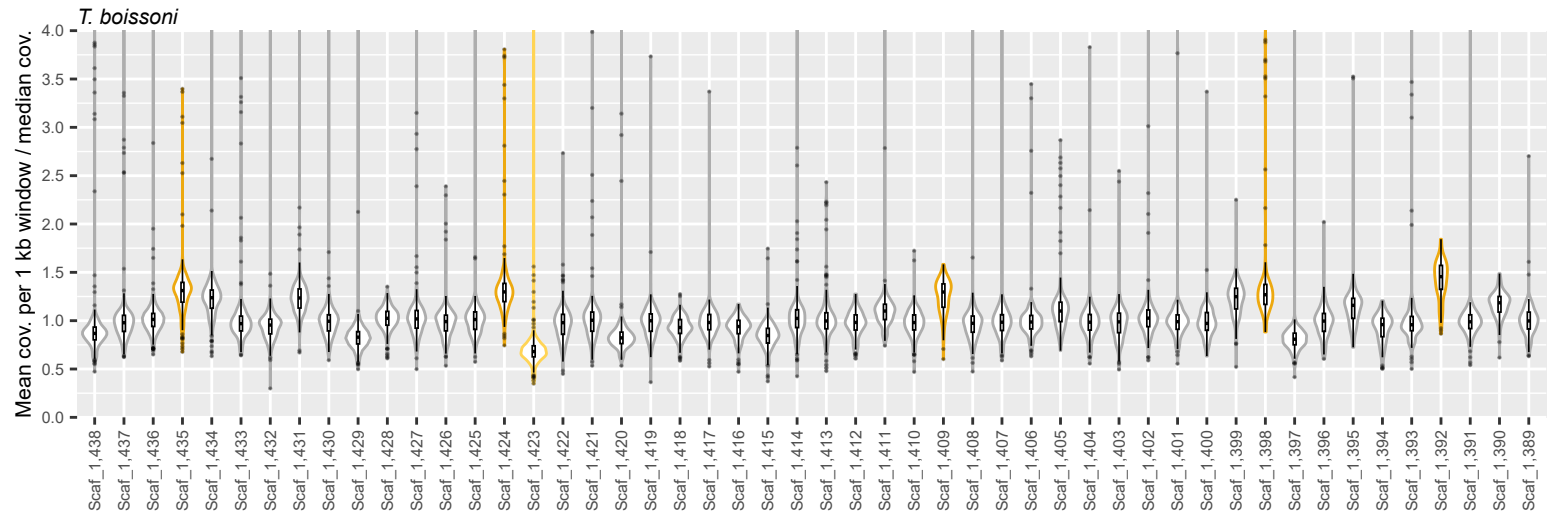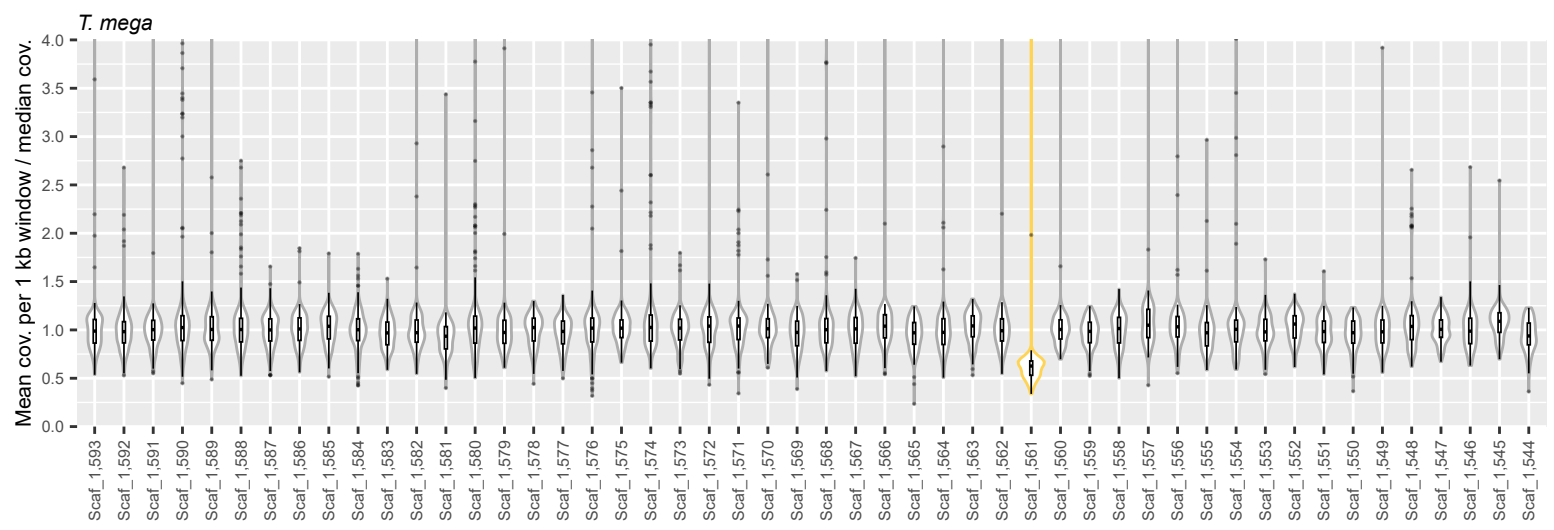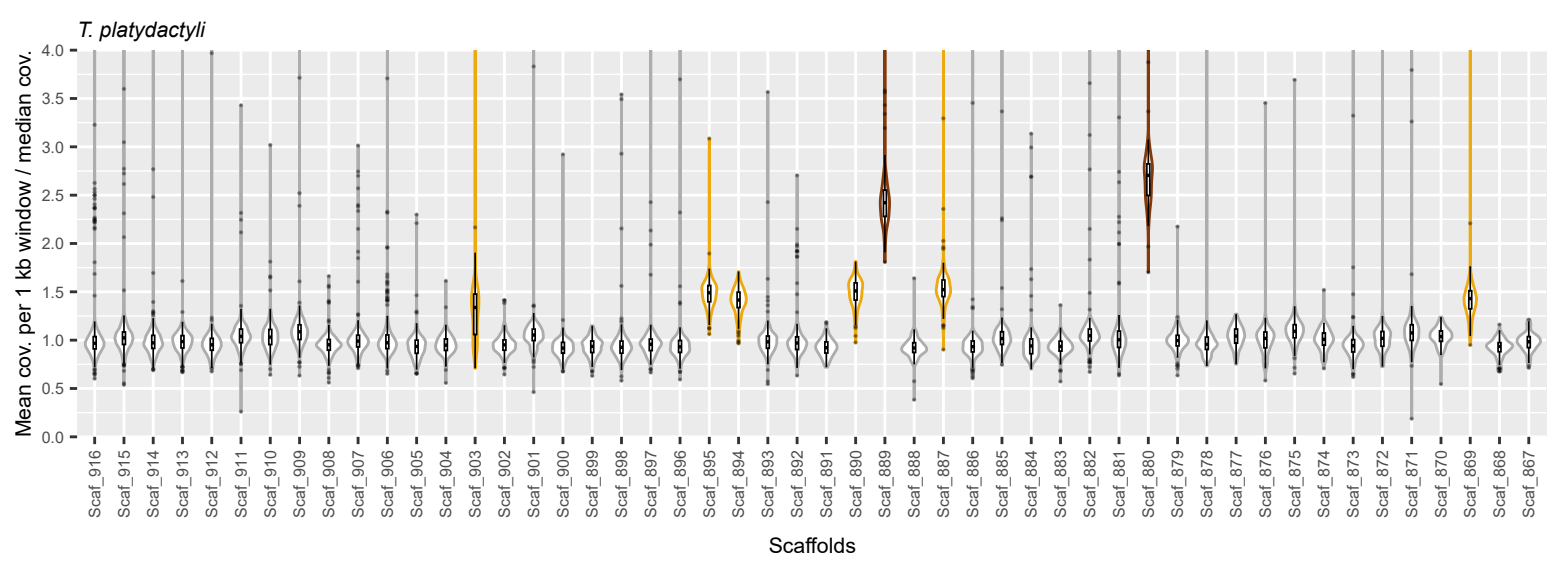

n 2n 3n 4n 5n

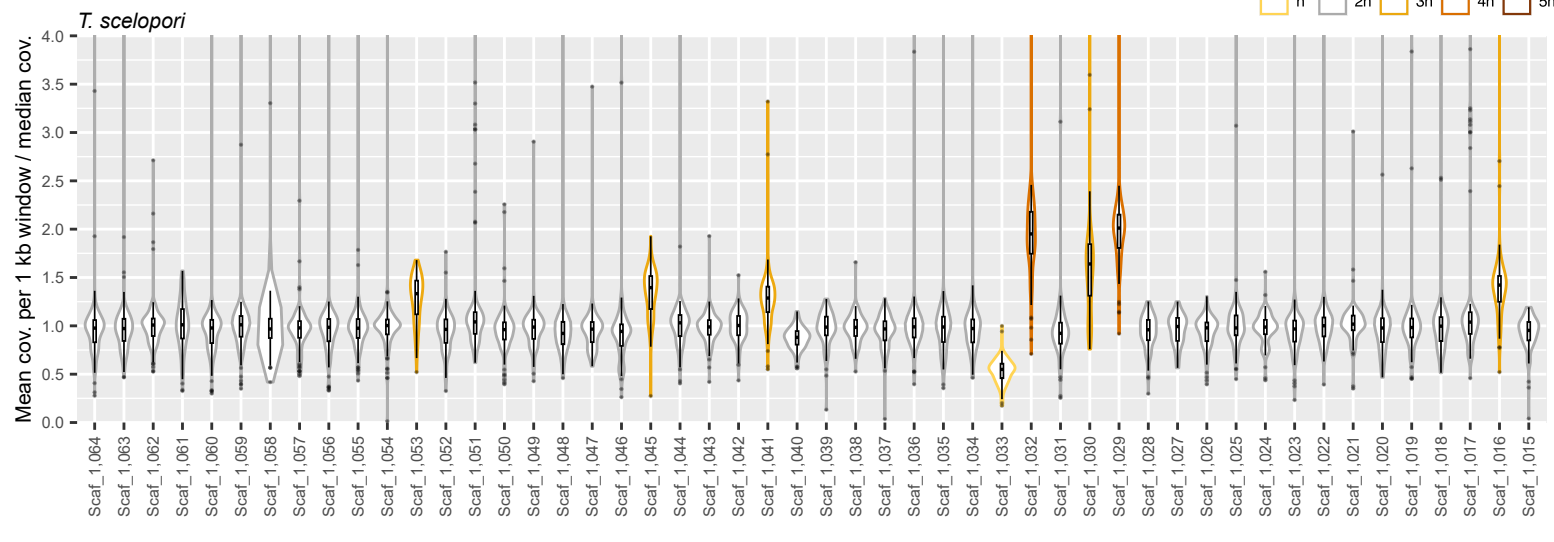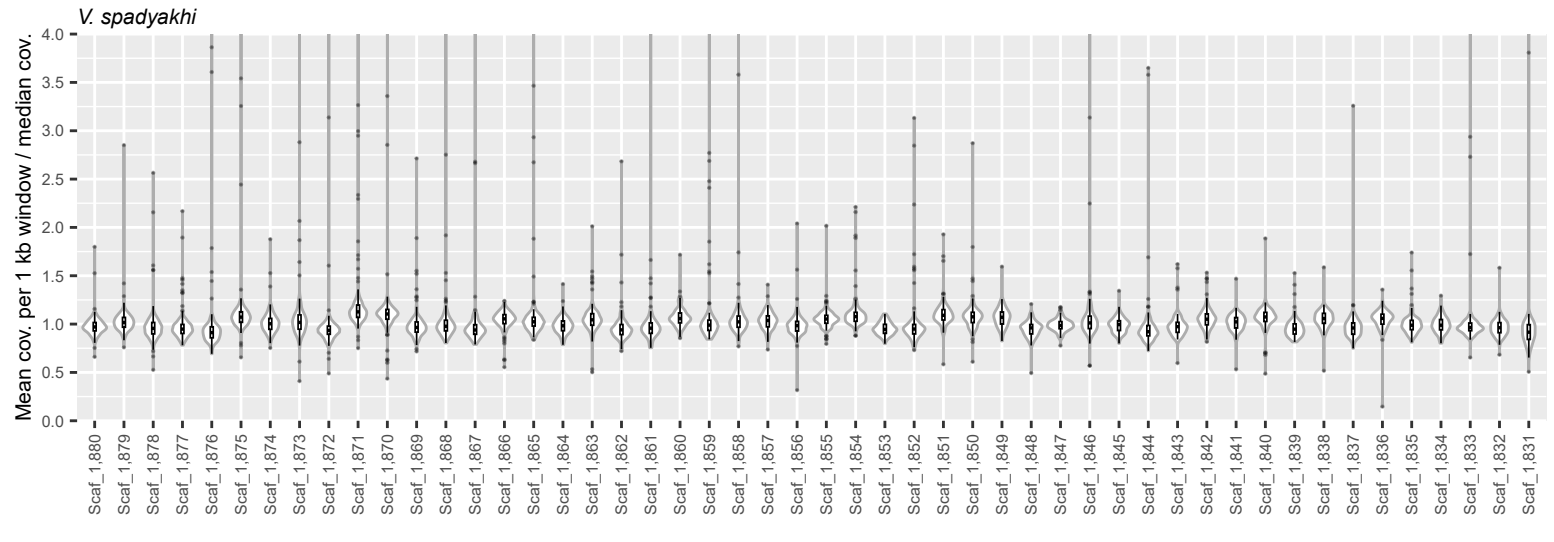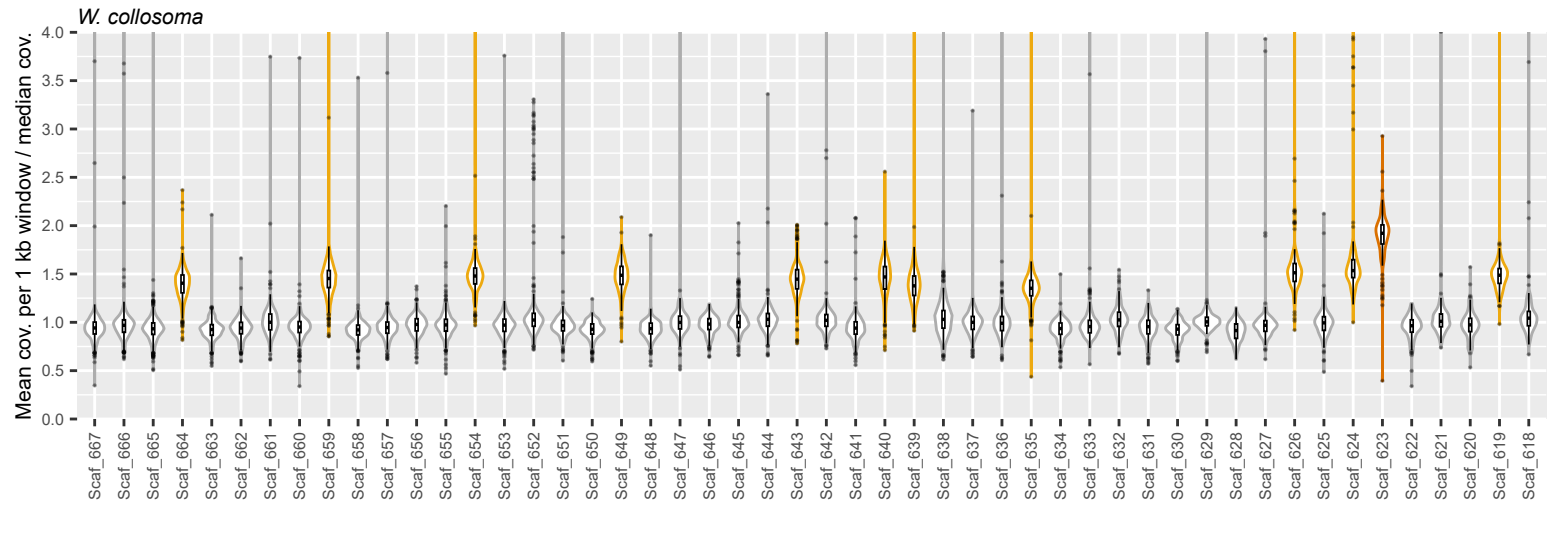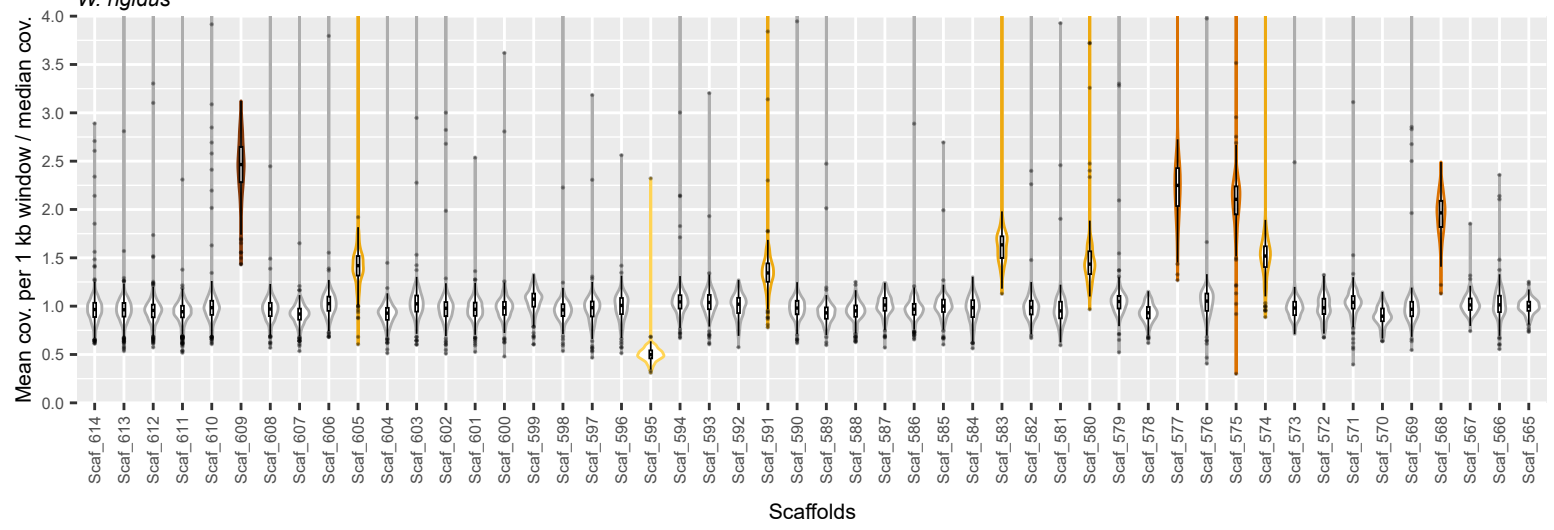

2n 3n 4n

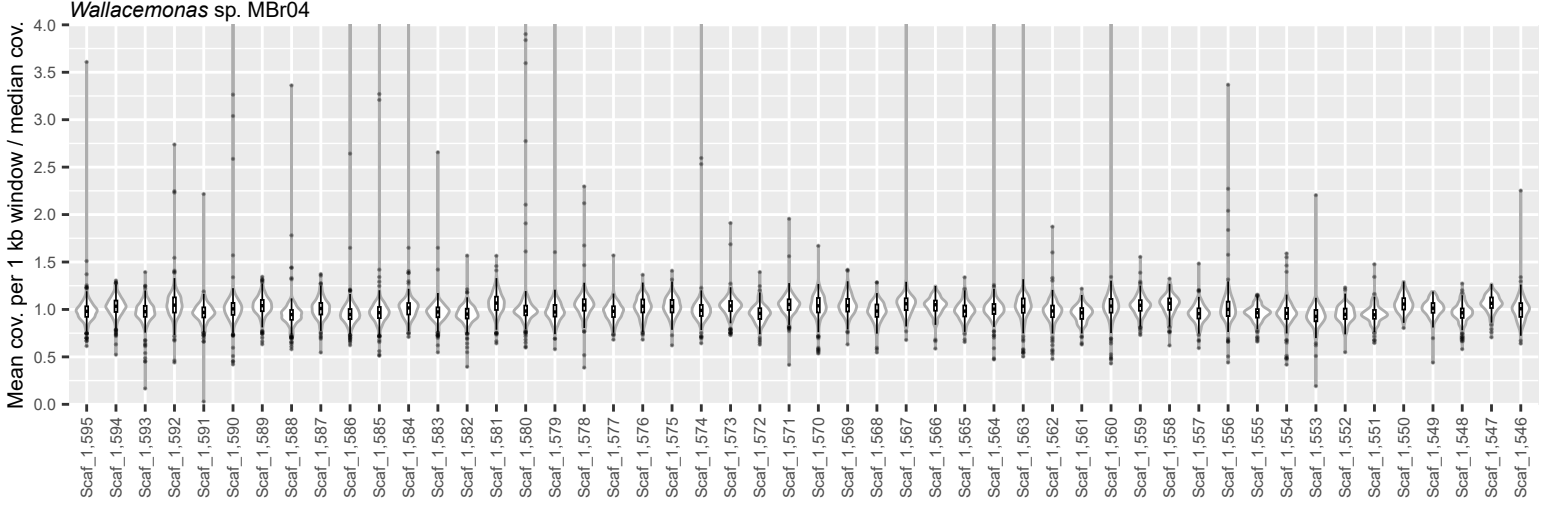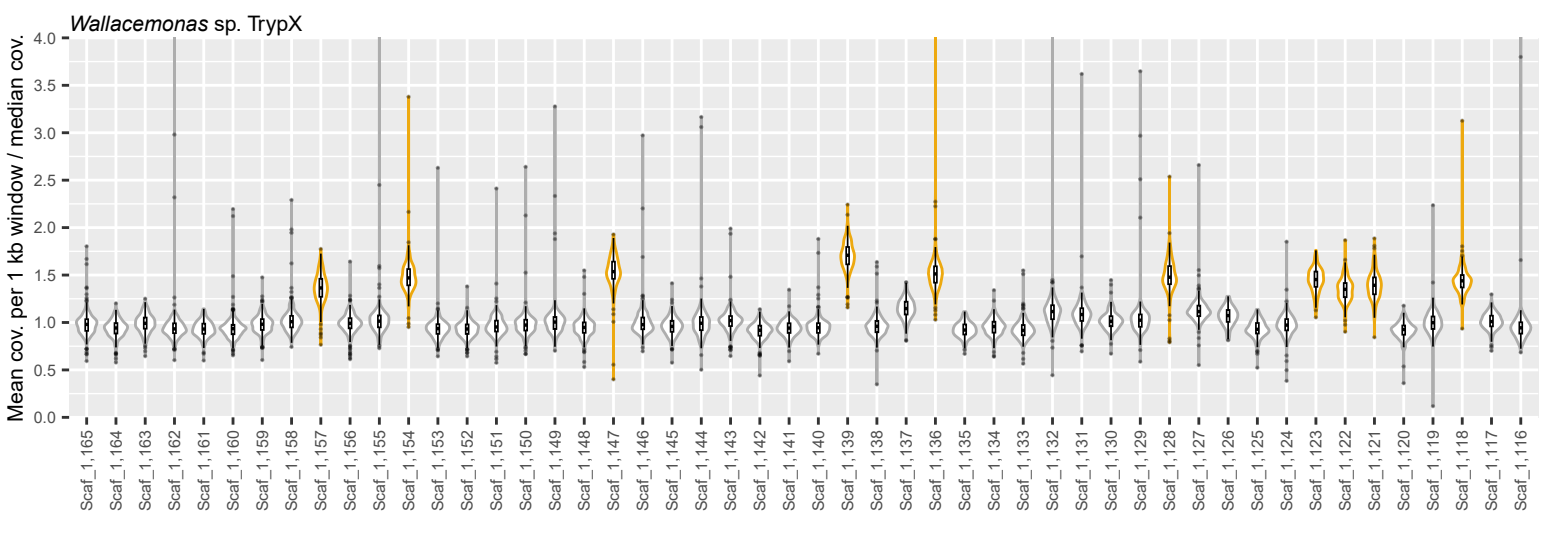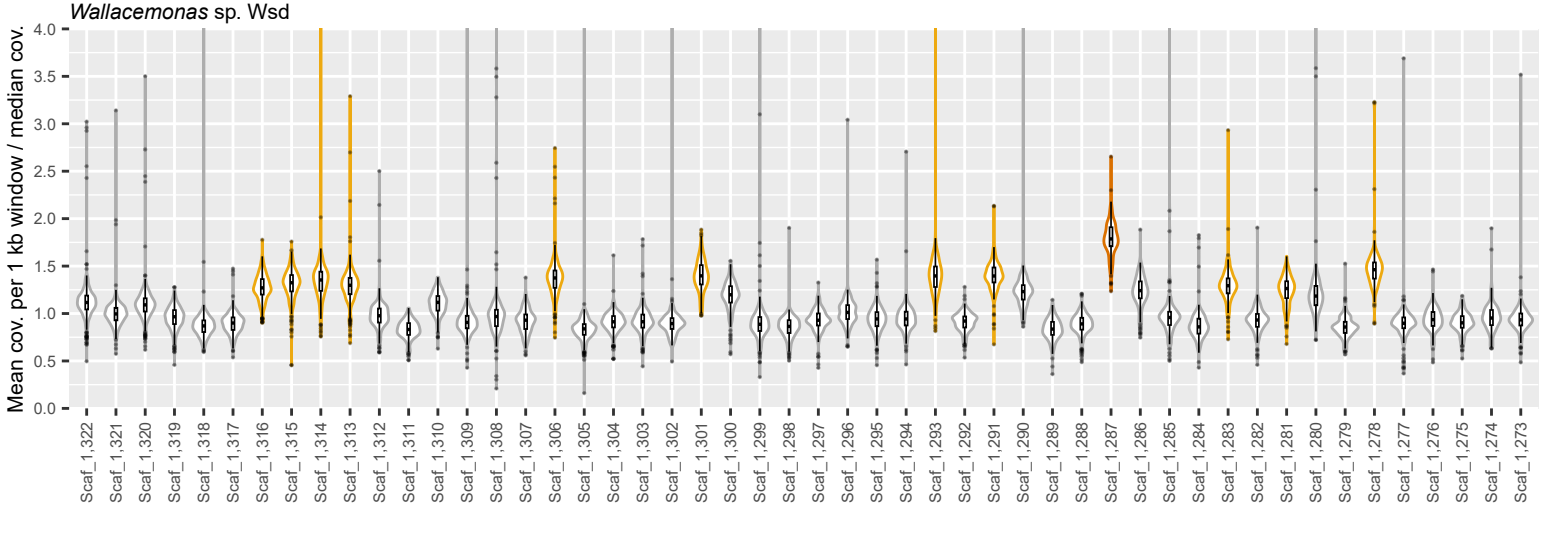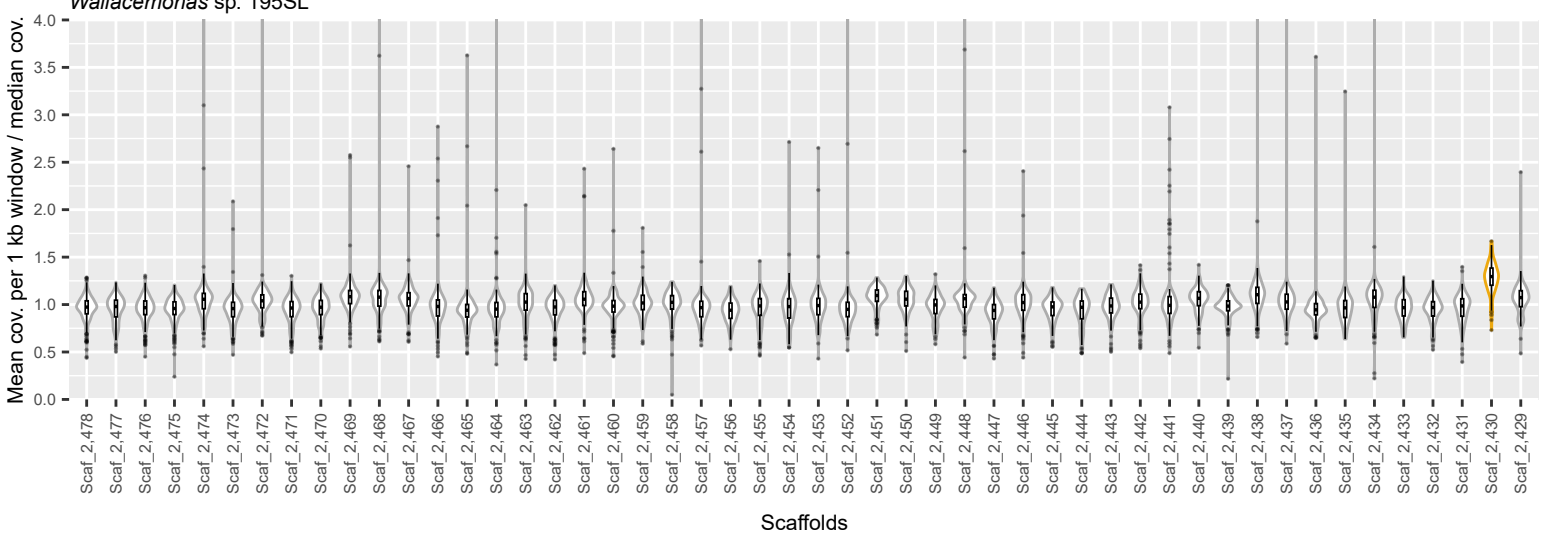

Scaffolds

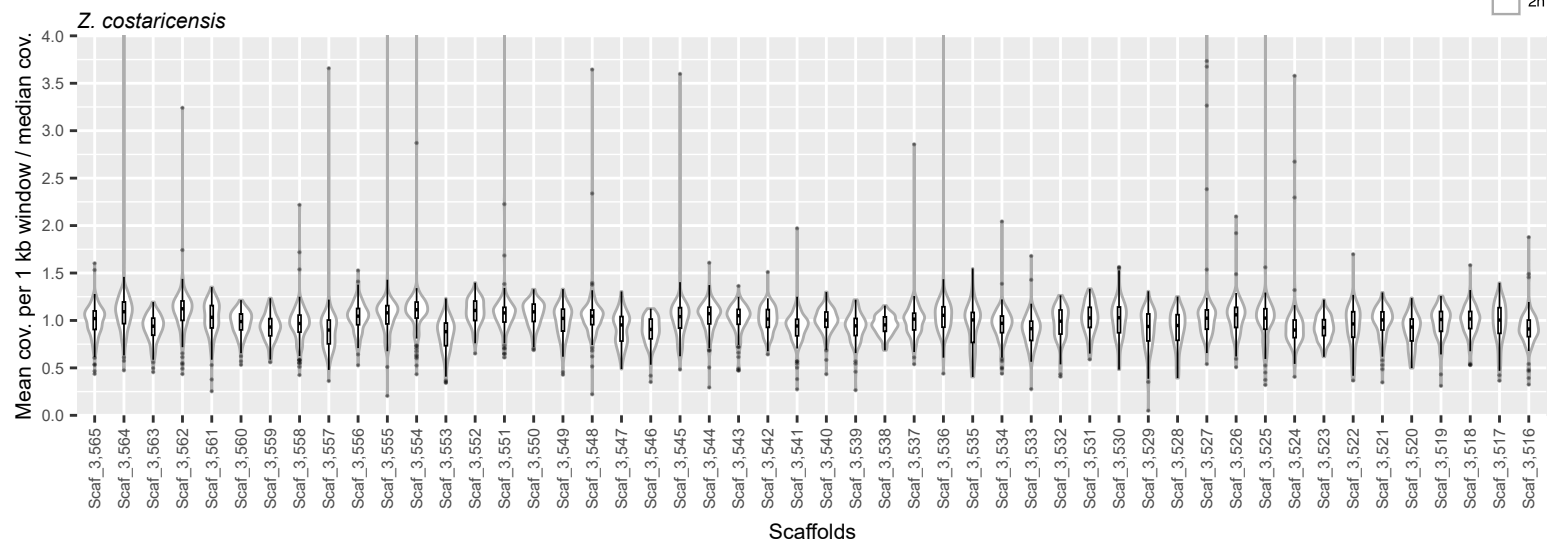

Supplement: 12864_2023_9591_MOESM6_ESM.pdf [file 12864_2023_9591_MOESM6_ESM.pdf]
