# Supplementary material for: Shining the spotlight on the neglected: new high-quality genome assemblies as a gateway to understanding the evolution of Trypanosomatidae
Source: PubMed Central journal article supplement (PMC10441713; doi:10.1186/s12864-023-09591-z), 2023-08-21

**Additional file 2.** Blobplots showing the state of genome assemblies before and after decontamination for the following species: *Borovskiyia barvae* (panel A), *Obscuromonas modryi* (B), *Trypanosoma avium* (C), *Trypanosoma boissoni* (D), *Trypanosoma mega* (E), *Trypanosoma platydictyli* (F), and *Trypanosoma scelopori* (G).

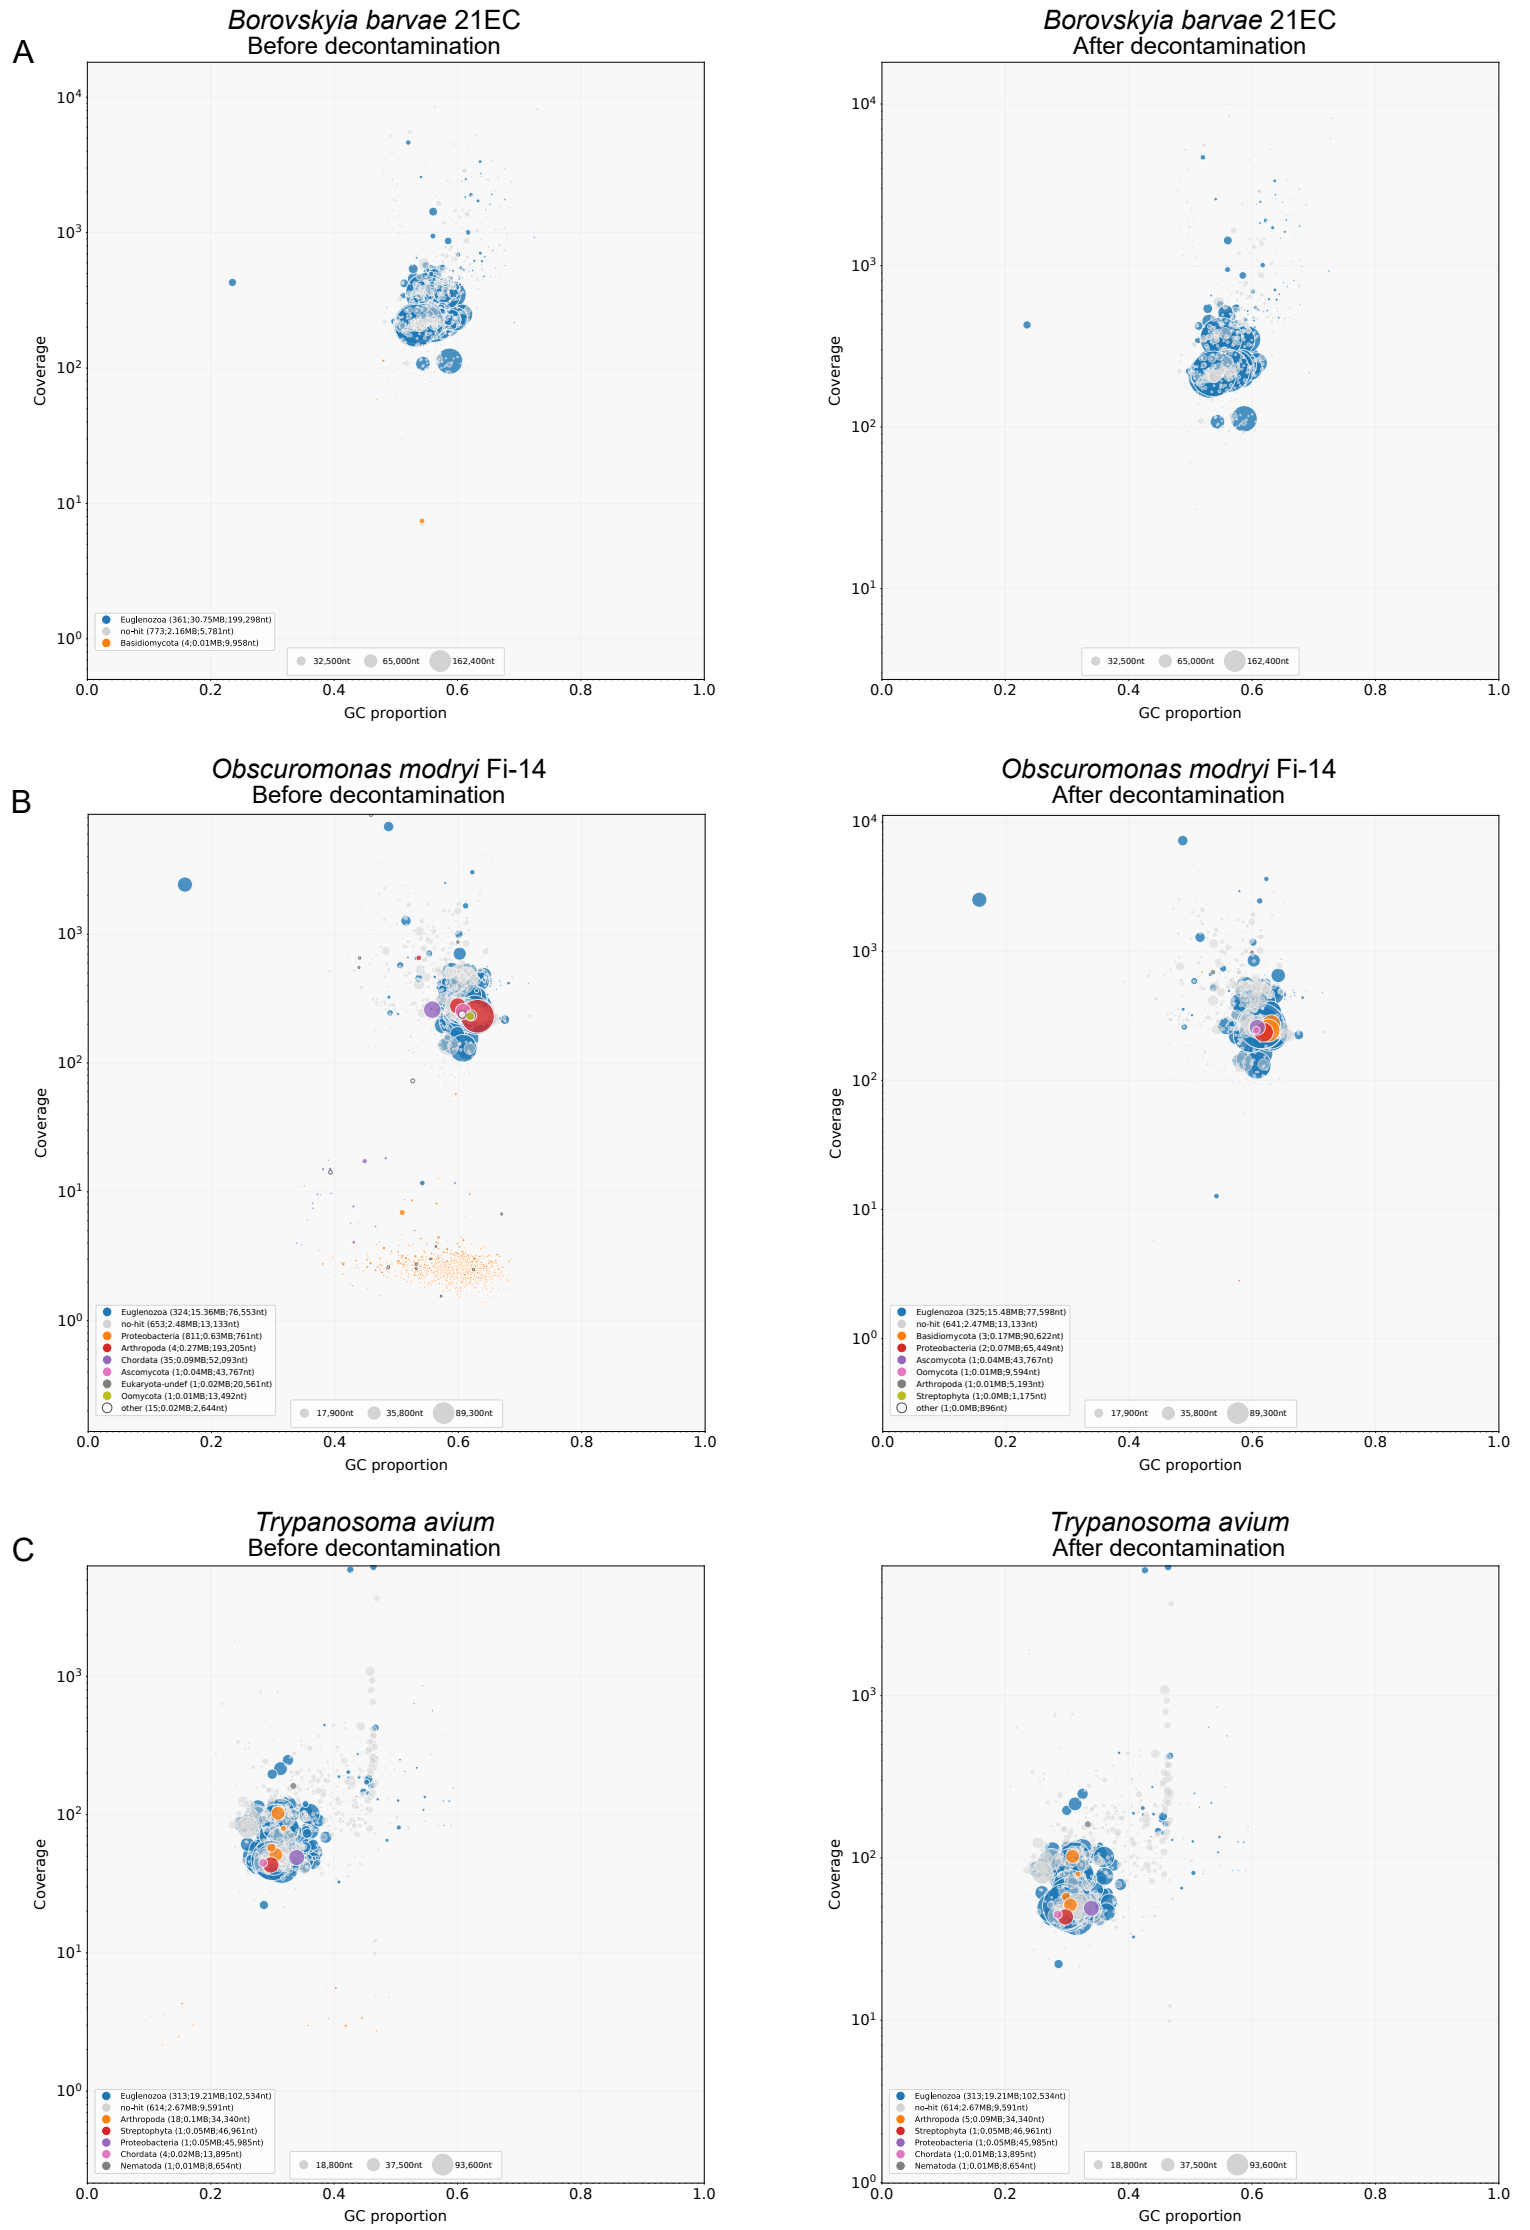

*Trypanosoma boissoni*  
Before decontamination

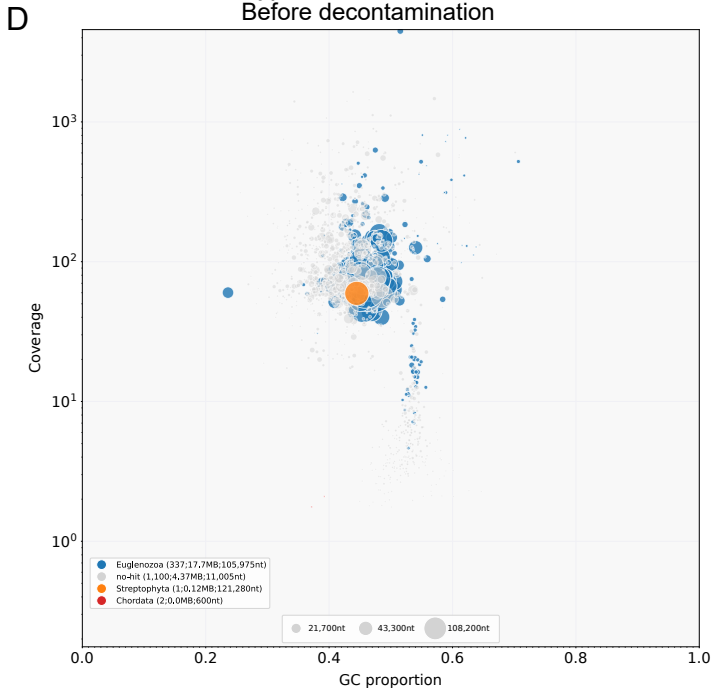

*Trypanosoma boissoni*  
After decontamination

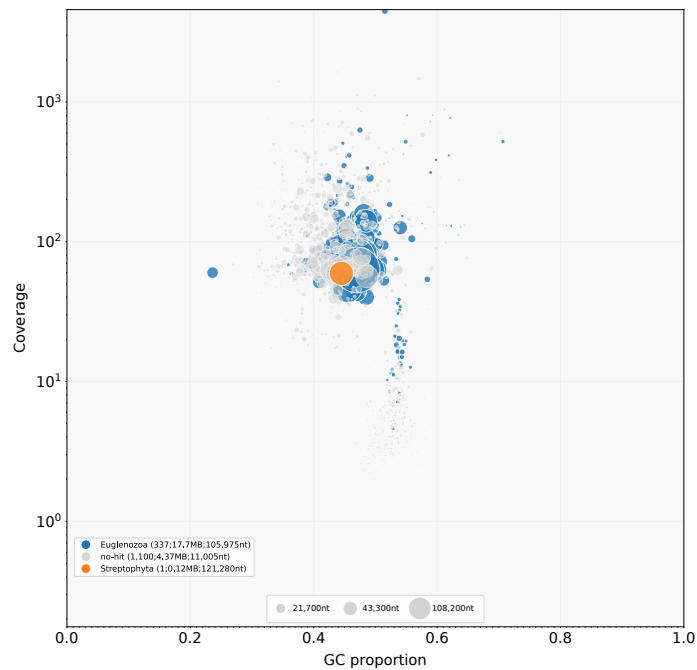

*Trypanosoma mega*  
Before decontamination

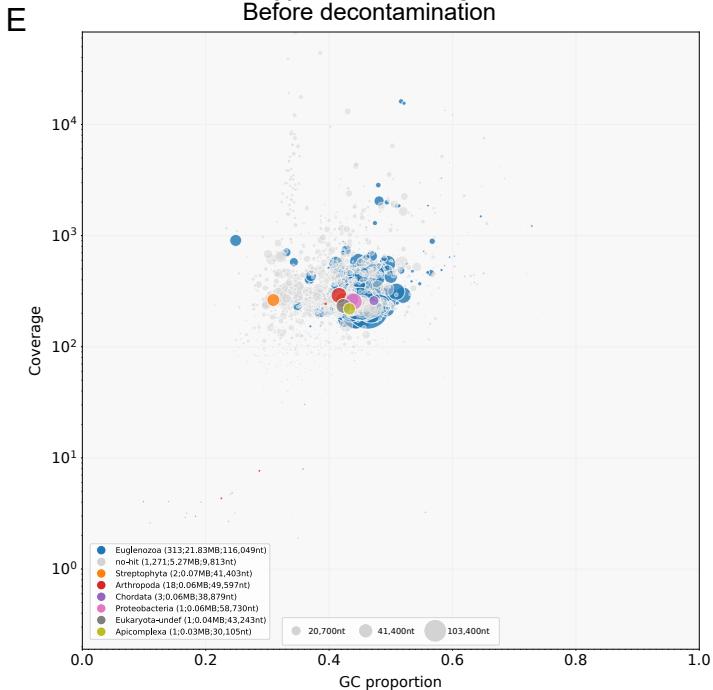

*Trypanosoma mega*  
After decontamination

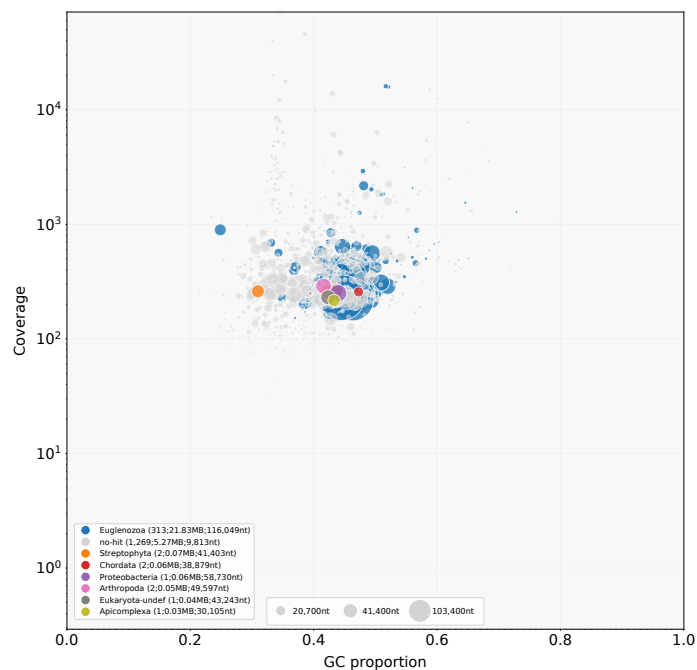

*Trypanosoma platydictyli* RI-340  
Before decontamination

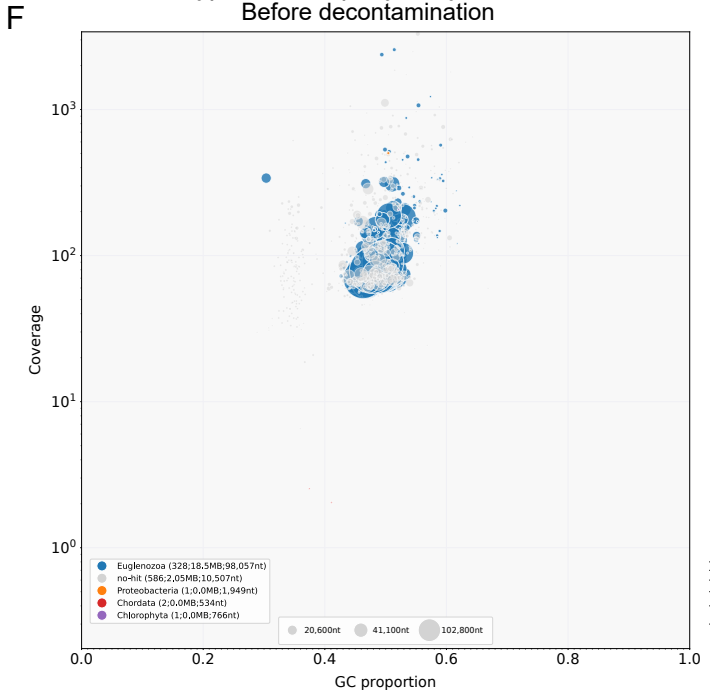

*Trypanosoma platydictyli* RI-340  
After decontamination

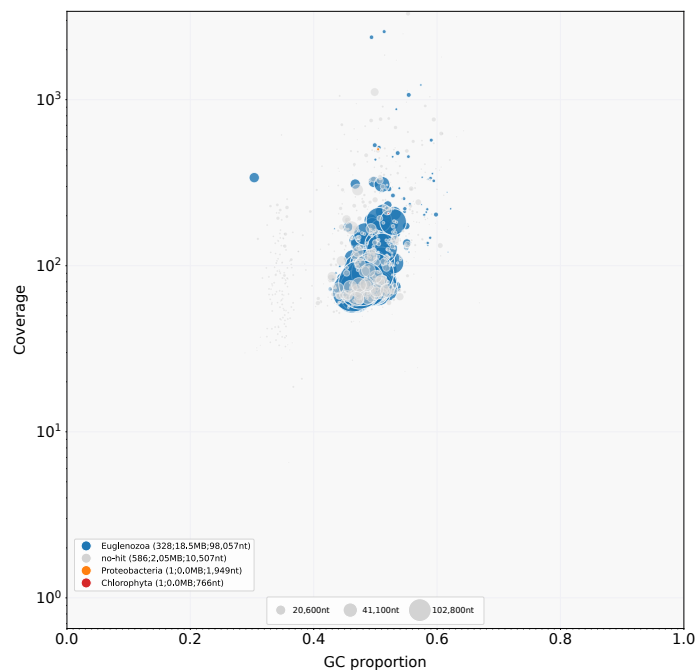

**G***Trypanosoma scelopori*  
Before decontamination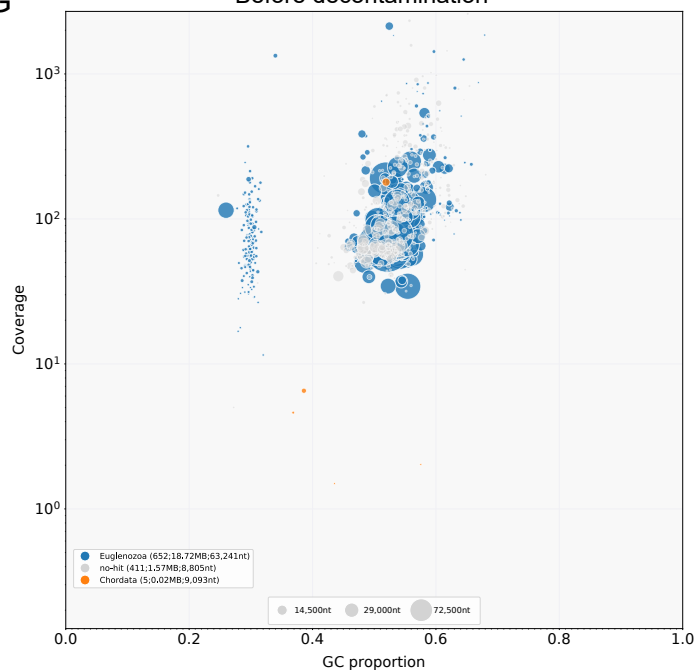*Trypanosoma scelopori*  
After decontamination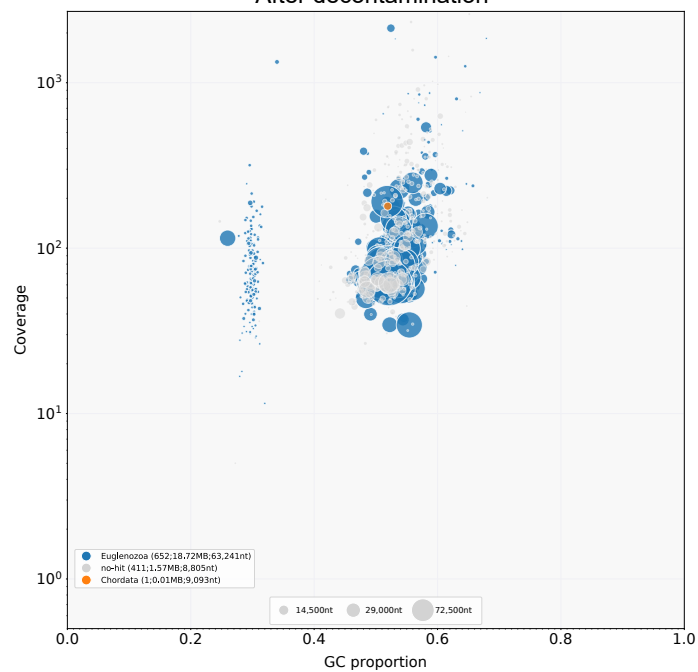

Supplement: 12864_2023_9591_MOESM2_ESM.pdf [file 12864_2023_9591_MOESM2_ESM.pdf]
