# Supplementary material for: Shining the spotlight on the neglected: new high-quality genome assemblies as a gateway to understanding the evolution of Trypanosomatidae
Source: PubMed Central journal article supplement (PMC10441713; doi:10.1186/s12864-023-09591-z), 2023-08-21
Supplement: 12864_2023_9591_MOESM4_ESM.pdf [file 12864_2023_9591_MOESM4_ESM.pdf]

**Additional file 4.** J-circos plots showing the distribution of repeats along ten longest scaffolds for each trypanosomatid species. The tracks are the following (from inside out): repeat distribution, GC skew, transcriptomic read mapping, scaffold borders and IDs. Total length of the ten largest scaffolds is shown in the center of each circle. Repeats are color-coded: yellow - LINEs, light green - low complexity, magenta - LTRs, blue - rolling circles, dark green - satellites, orange - simple repeats, red - transposons, turquoise - unclassified repeats.

RNA-seq coverage

GC skew

Repeats (third track):

LINEs

Low complexity

LTR

Rolling-circles

Satellite

Simple repeat

Transposons

Unclassified

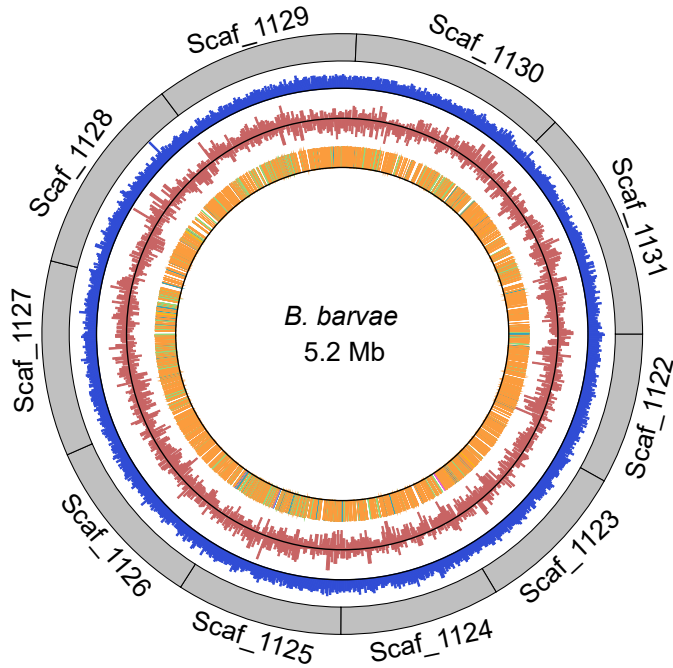

20 LINEs, 444 Low complexity, 6 LTRs, 2,927 Simple repeats, 102 Unclassified  
Total repeats: 160,793 bp  
Transcribed repeats: 141,807 bp

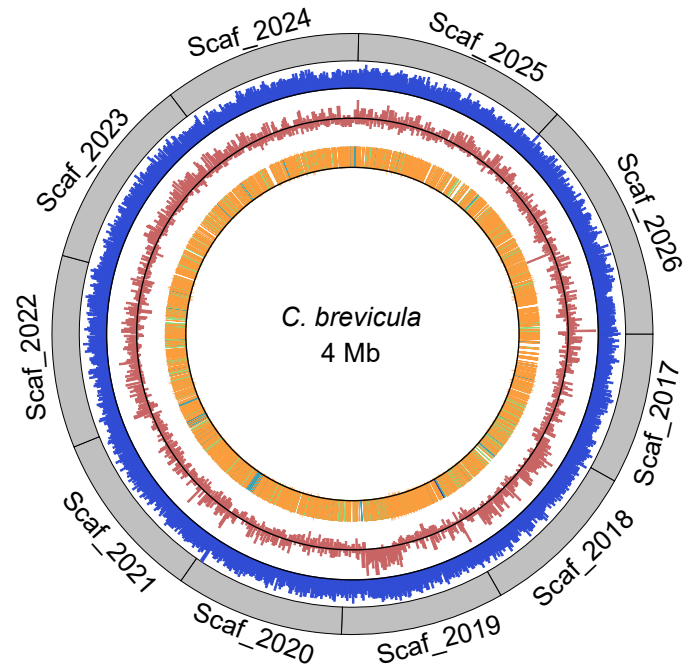

425 Low complexity, 2 LTRs, 1 Rolling-circle, 3,240 Simple repeats, 76 Unclassified  
Total repeats: 175,233 bp  
Transcribed repeats: 164,367 bp

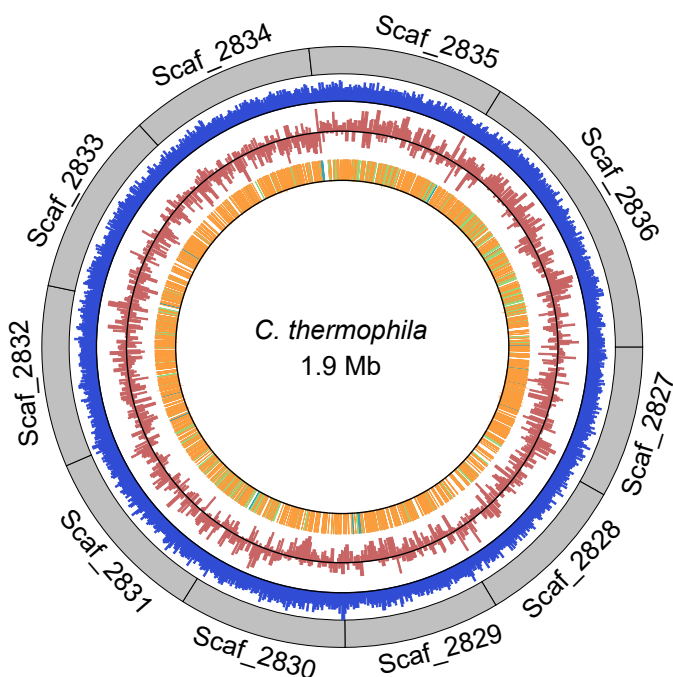

236 Low complexity, 1,755 Simple repeats, 26 Unclassified  
Total repeats: 82,256 bp  
Transcribed repeats: 79,441 bp

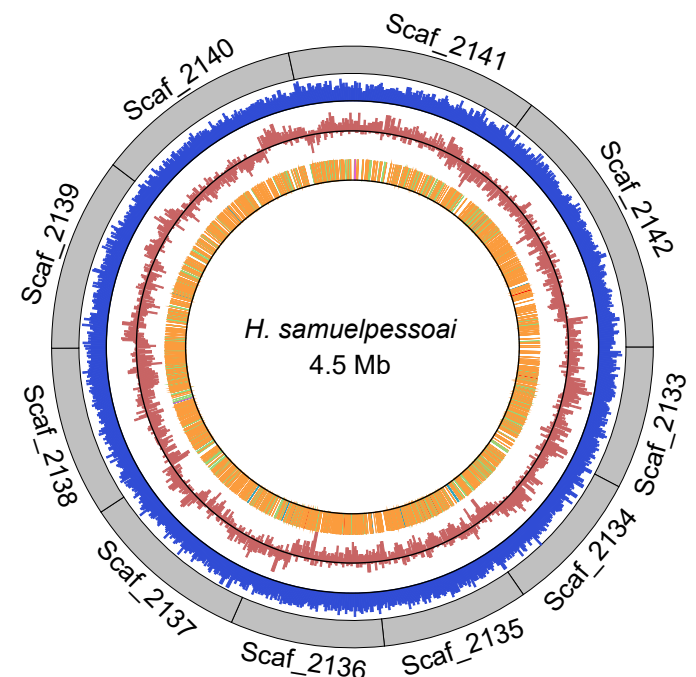

411 Low complexity, 4 LTRs, 2,349 Simple repeats, 7 Transposons, 22 Unclassified  
Total repeats: 114,623 bp  
Transcribed repeats: 99,717 bp

RNA-seq coverage

GC skew

Repeats (third track):

LINES

Low complexity

LTR

Rolling-circles

Satellite

Simple repeat

Transposons

Unclassified

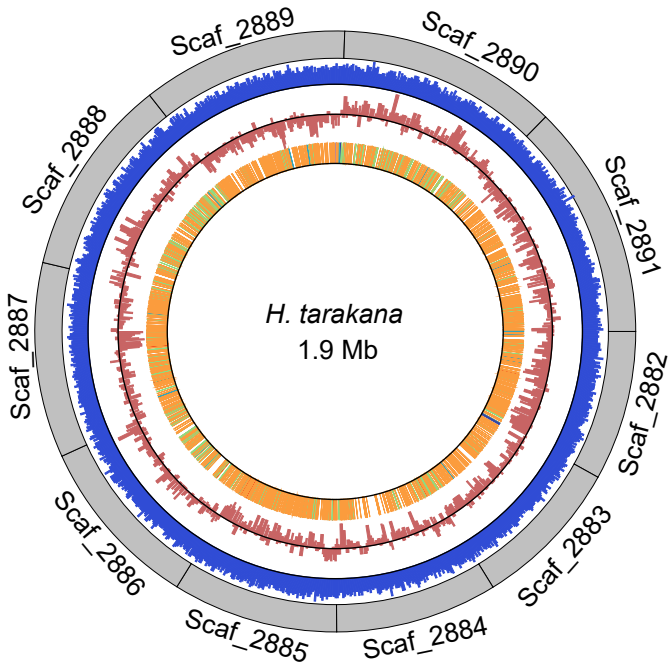

286 Low complexity, 1 LTR, 2 Rolling-circles,  
1,970 Simple repeats, 8 Transposons, 20 Unclassified  
Total repeats: 93,652 bp  
Transcribed repeats: 89,716 bp

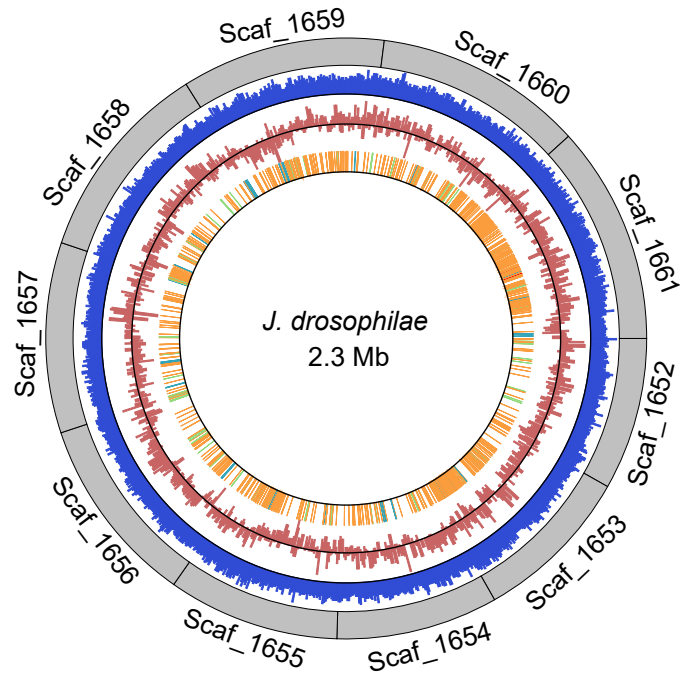

71 Low complexity, 892 Simple repeats, 2 Transposons,  
51 Unclassified  
Total repeats: 49,655 bp  
Transcribed repeats: 46,319 bp

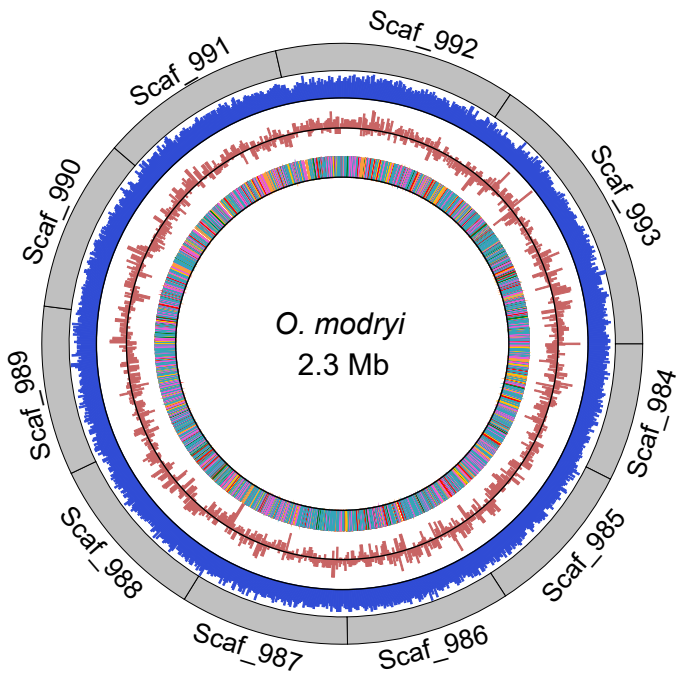

556 LINES, 23 Low complexity, 1,735 LTRs, 176 Satellites,  
3,264 Simple repeats, 472 Transposons, 3,234 Unclassified  
Total repeats: 989,415 bp  
Transcribed repeats: 988,427 bp

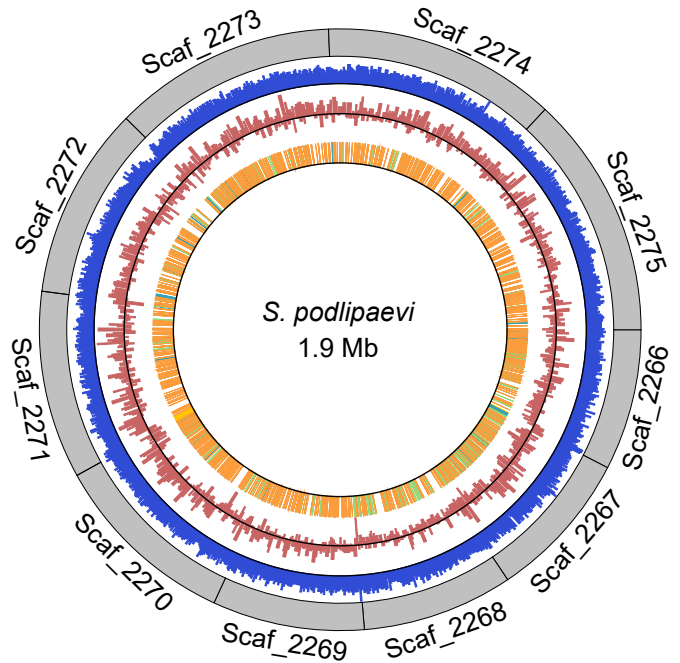

11 LINES, 235 Low complexity, 1,736 Simple repeats,  
2 Transposons, 36 Unclassified  
Total repeats: 91,736 bp  
Transcribed repeats: 84,527 bp

RNA-seq coverage

GC skew

Repeats (third track):

LINEs

Low complexity

LTR

Rolling-circles

Satellite

Simple repeat

Transposons

Unclassified

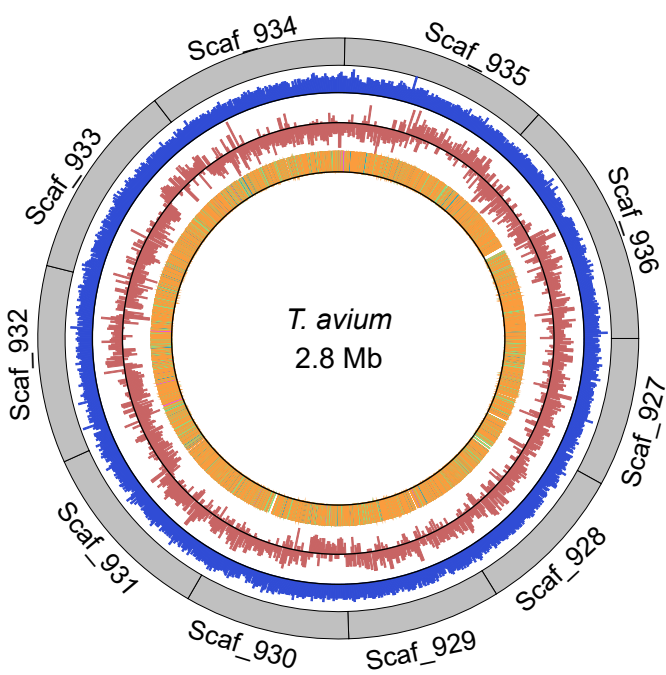

1,485 Low complexity, 37 LTRs, 1 Rolling-circles,  
7,787 Simple repeats, 1 Transposons, 241 Unclassified  
Total repeats: 436,195 bp  
Transcribed repeats: 434,757 bp

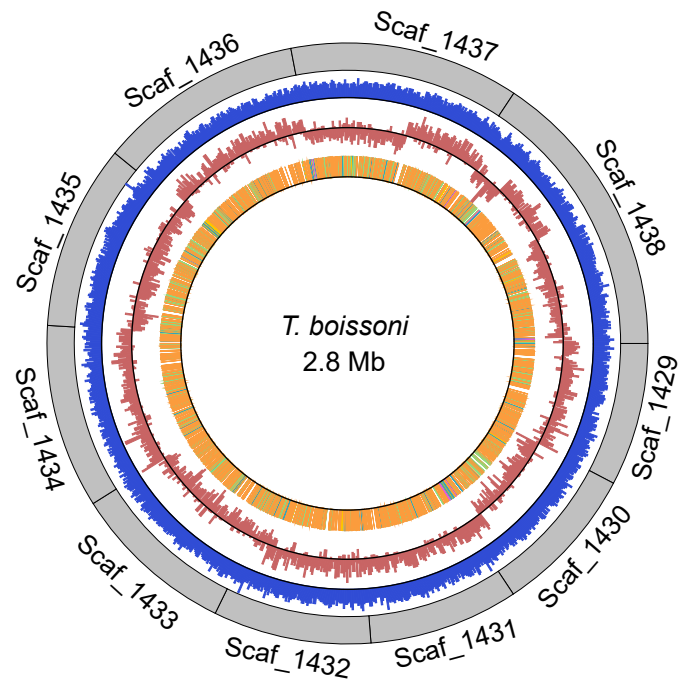

567 Low complexity, 30 LINEs, 22 LTRs, 3,165 Simple repeats,  
146 Unclassified  
Total repeats: 209,605 bp  
Transcribed repeats: 207,862 bp

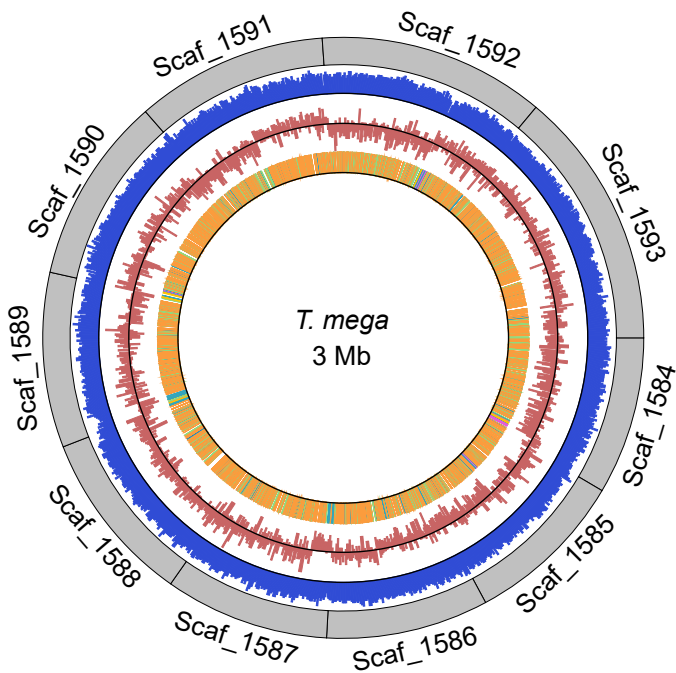

10 LINEs, 886 Low complexity, 22 LTRs, 1 Rolling-circle,  
4,110 Simple repeats, 185 Unclassified  
Total repeats: 307,412 bp  
Transcribed repeats: 287,607 bp

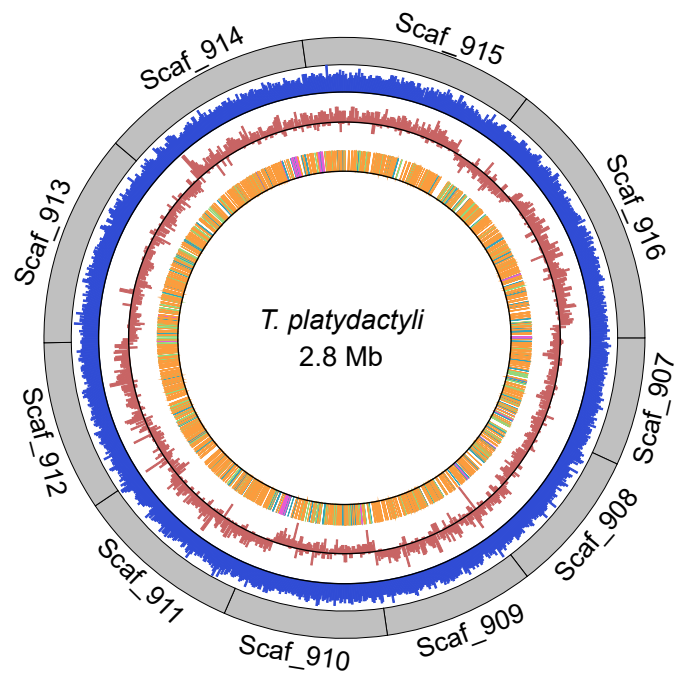

286 Low complexity, 61 LTRs, 1,798 Simple repeats,  
206 Unclassified  
Total repeats: 171,075 bp  
Transcribed repeats: 162,414 bp



RNA-seq coverage

GC skew

Repeats (third track):

LINEs

Low complexity

LTR

Rolling-circles

Satellite

Simple repeat

Transposons

Unclassified

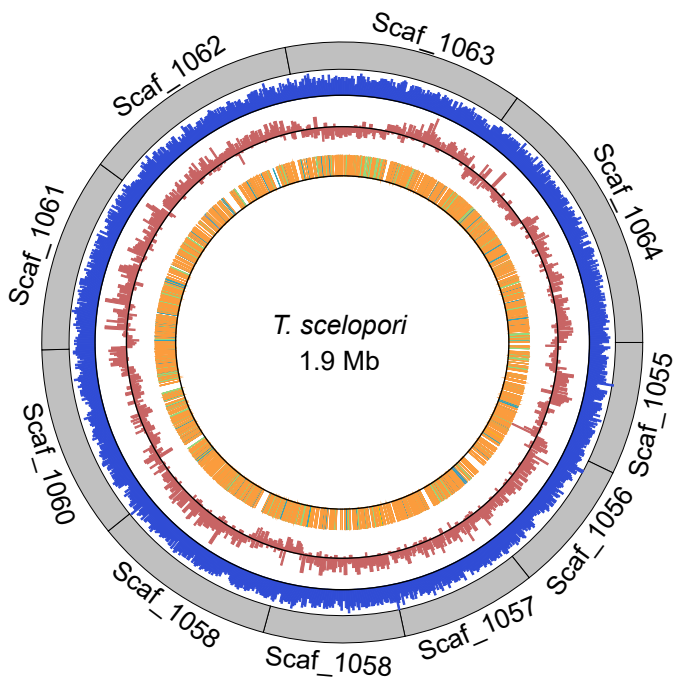

6 LINEs, 310 Low complexity, 5 LTRs, 3,233 Simple repeats, 150 Unclassified  
Total repeats: 142,113 bp  
Transcribed repeats: 141,889 bp

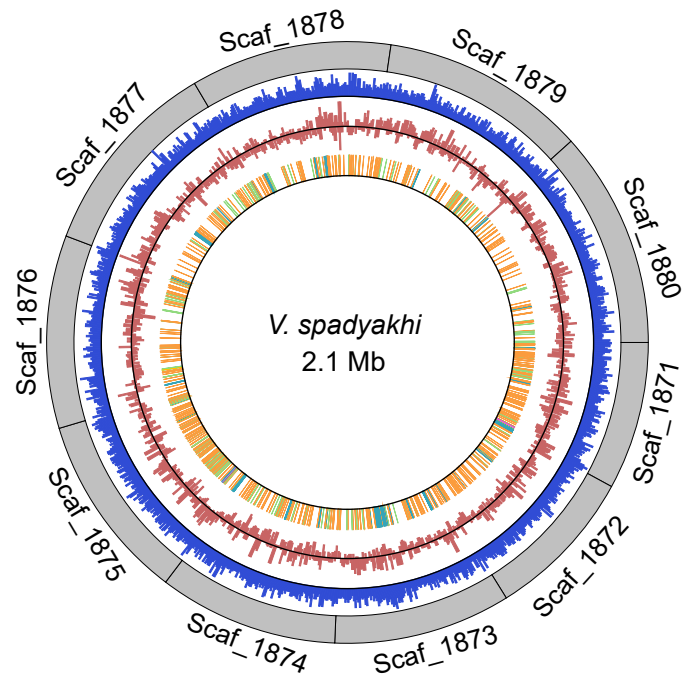

158 Low complexity, 8 LINEs, 2 LTRs, 653 Simple repeats, 201 Unclassified  
Total repeats: 92,108 bp  
Transcribed repeats: 88,401 bp

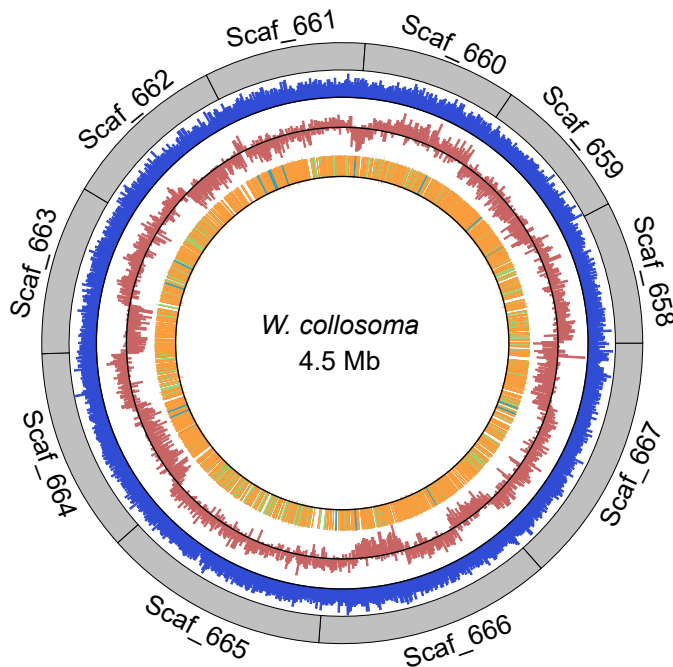

380 Low complexity, 2,388 Simple repeats, 48 Unclassified  
Total repeats: 110,231 bp  
Transcribed repeats: 97,296 bp

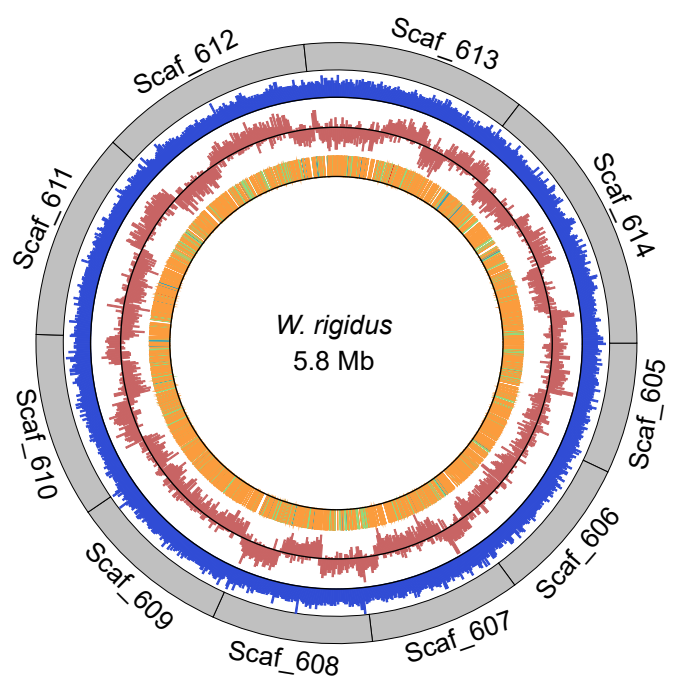

472 Low complexity, 3,287 Simple repeats, 2 Transposons, 51 Unclassified  
Total repeats: 154,577 bp  
Transcribed repeats: 133,881 bp



RNA-seq coverage

GC skew

Repeats (third track):

LINEs

Low complexity

LTR

Rolling-circles

Satellite

Simple repeat

Transposons

Unclassified

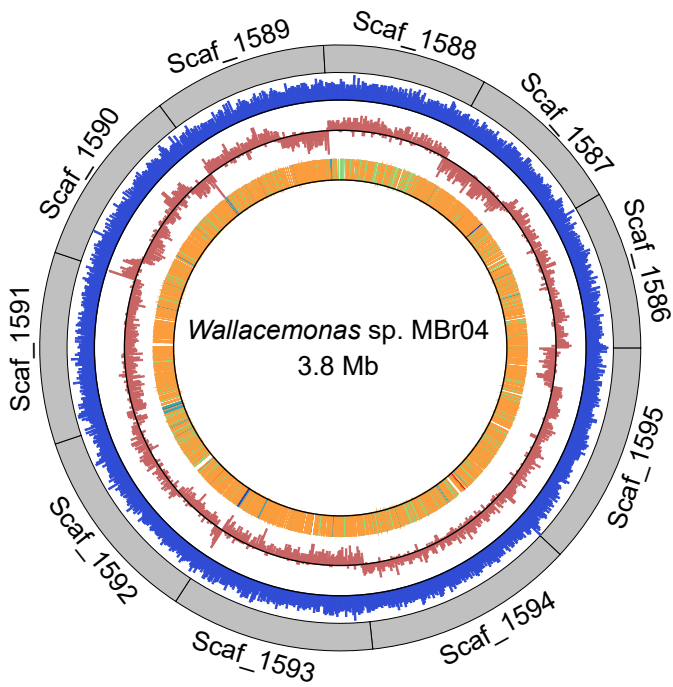

456 Low complexity, 5 Rolling-circles, 2,893 Simple repeats,  
6 Transposons, 87 Unclassified  
Total repeats: 172,956 bp  
Transcribed repeats: 157,035 bp

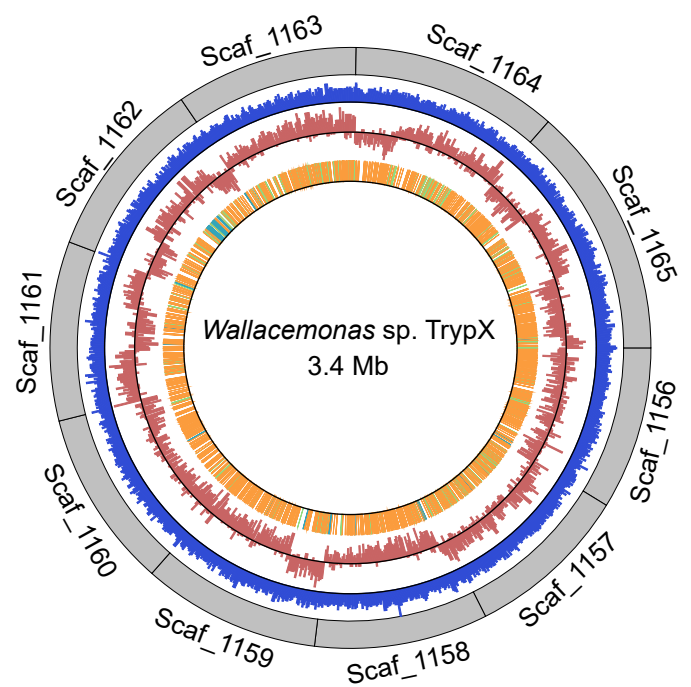

228 Low complexity, 1,829 Simple repeats, 57 Unclassified  
Total repeats: 108,093 bp  
Transcribed repeats: 98,546 bp

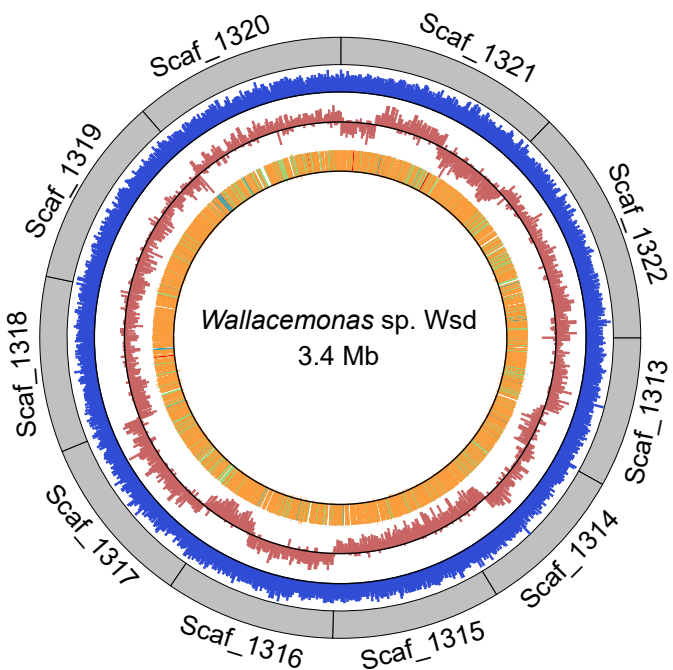

434 Low complexity, 1 Rolling-circle, 2,898 Simple repeats,  
8 Transposons, 26 Unclassified  
Total repeats: 145,538 bp  
Transcribed repeats: 133,207 bp

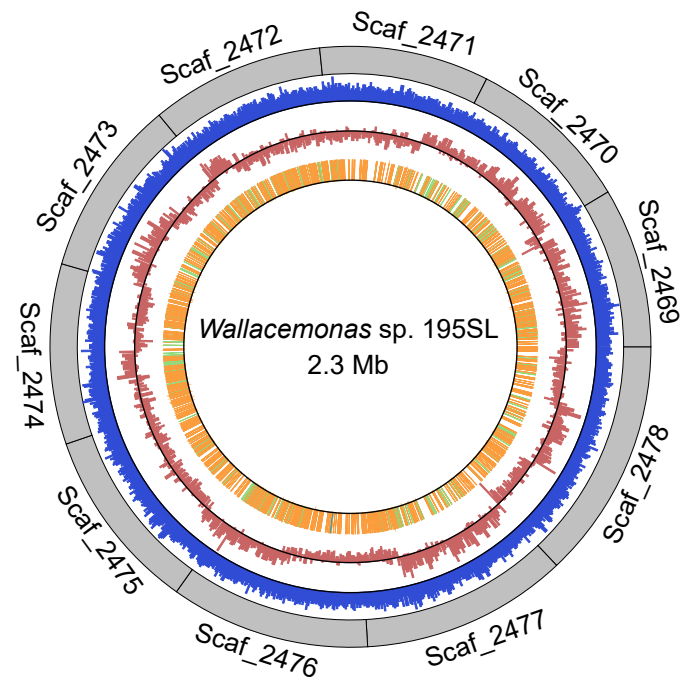

264 Low complexity, 1,443 Simple repeats, 2 Unclassified  
Total repeats: 63,113 bp  
Transcribed repeats: 51,517 bp

RNA-seq coverage

GC skew

Repeats (third track):

LINEs

Low complexity

LTR

Rolling-circles

Satellite

Simple repeat

Transposons

Unclassified

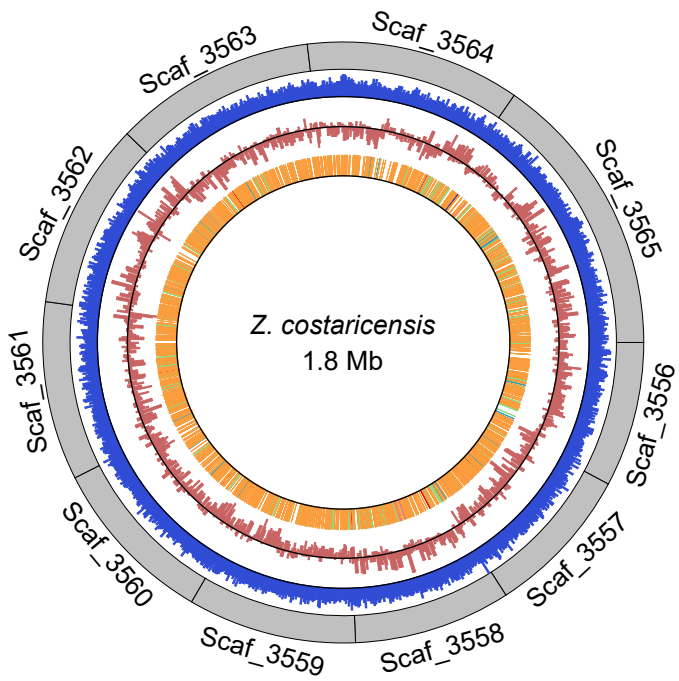

183 Low complexity, 9 LTRs, 3 Rolling-circles,  
1,916 Simple repeats, 7 Transposons, 25 Unclassified  
Total repeats: 92,919 bp  
Transcribed repeats: 88,351 bp
