# Supplementary material for: Shining the spotlight on the neglected: new high-quality genome assemblies as a gateway to understanding the evolution of Trypanosomatidae
Source: PubMed Central journal article supplement (PMC10441713; doi:10.1186/s12864-023-09591-z), 2023-08-21
Supplement: 12864_2023_9591_MOESM7_ESM.pdf [file 12864_2023_9591_MOESM7_ESM.pdf]

**Additional file 7.** Genome ploidy estimation based on the analysis of heterozygous  $k$ -mer pairs. Total coverage of  $k$ -mer pairs and normalized minor  $k$ -mer coverage are plotted on Y and X axes, respectively.

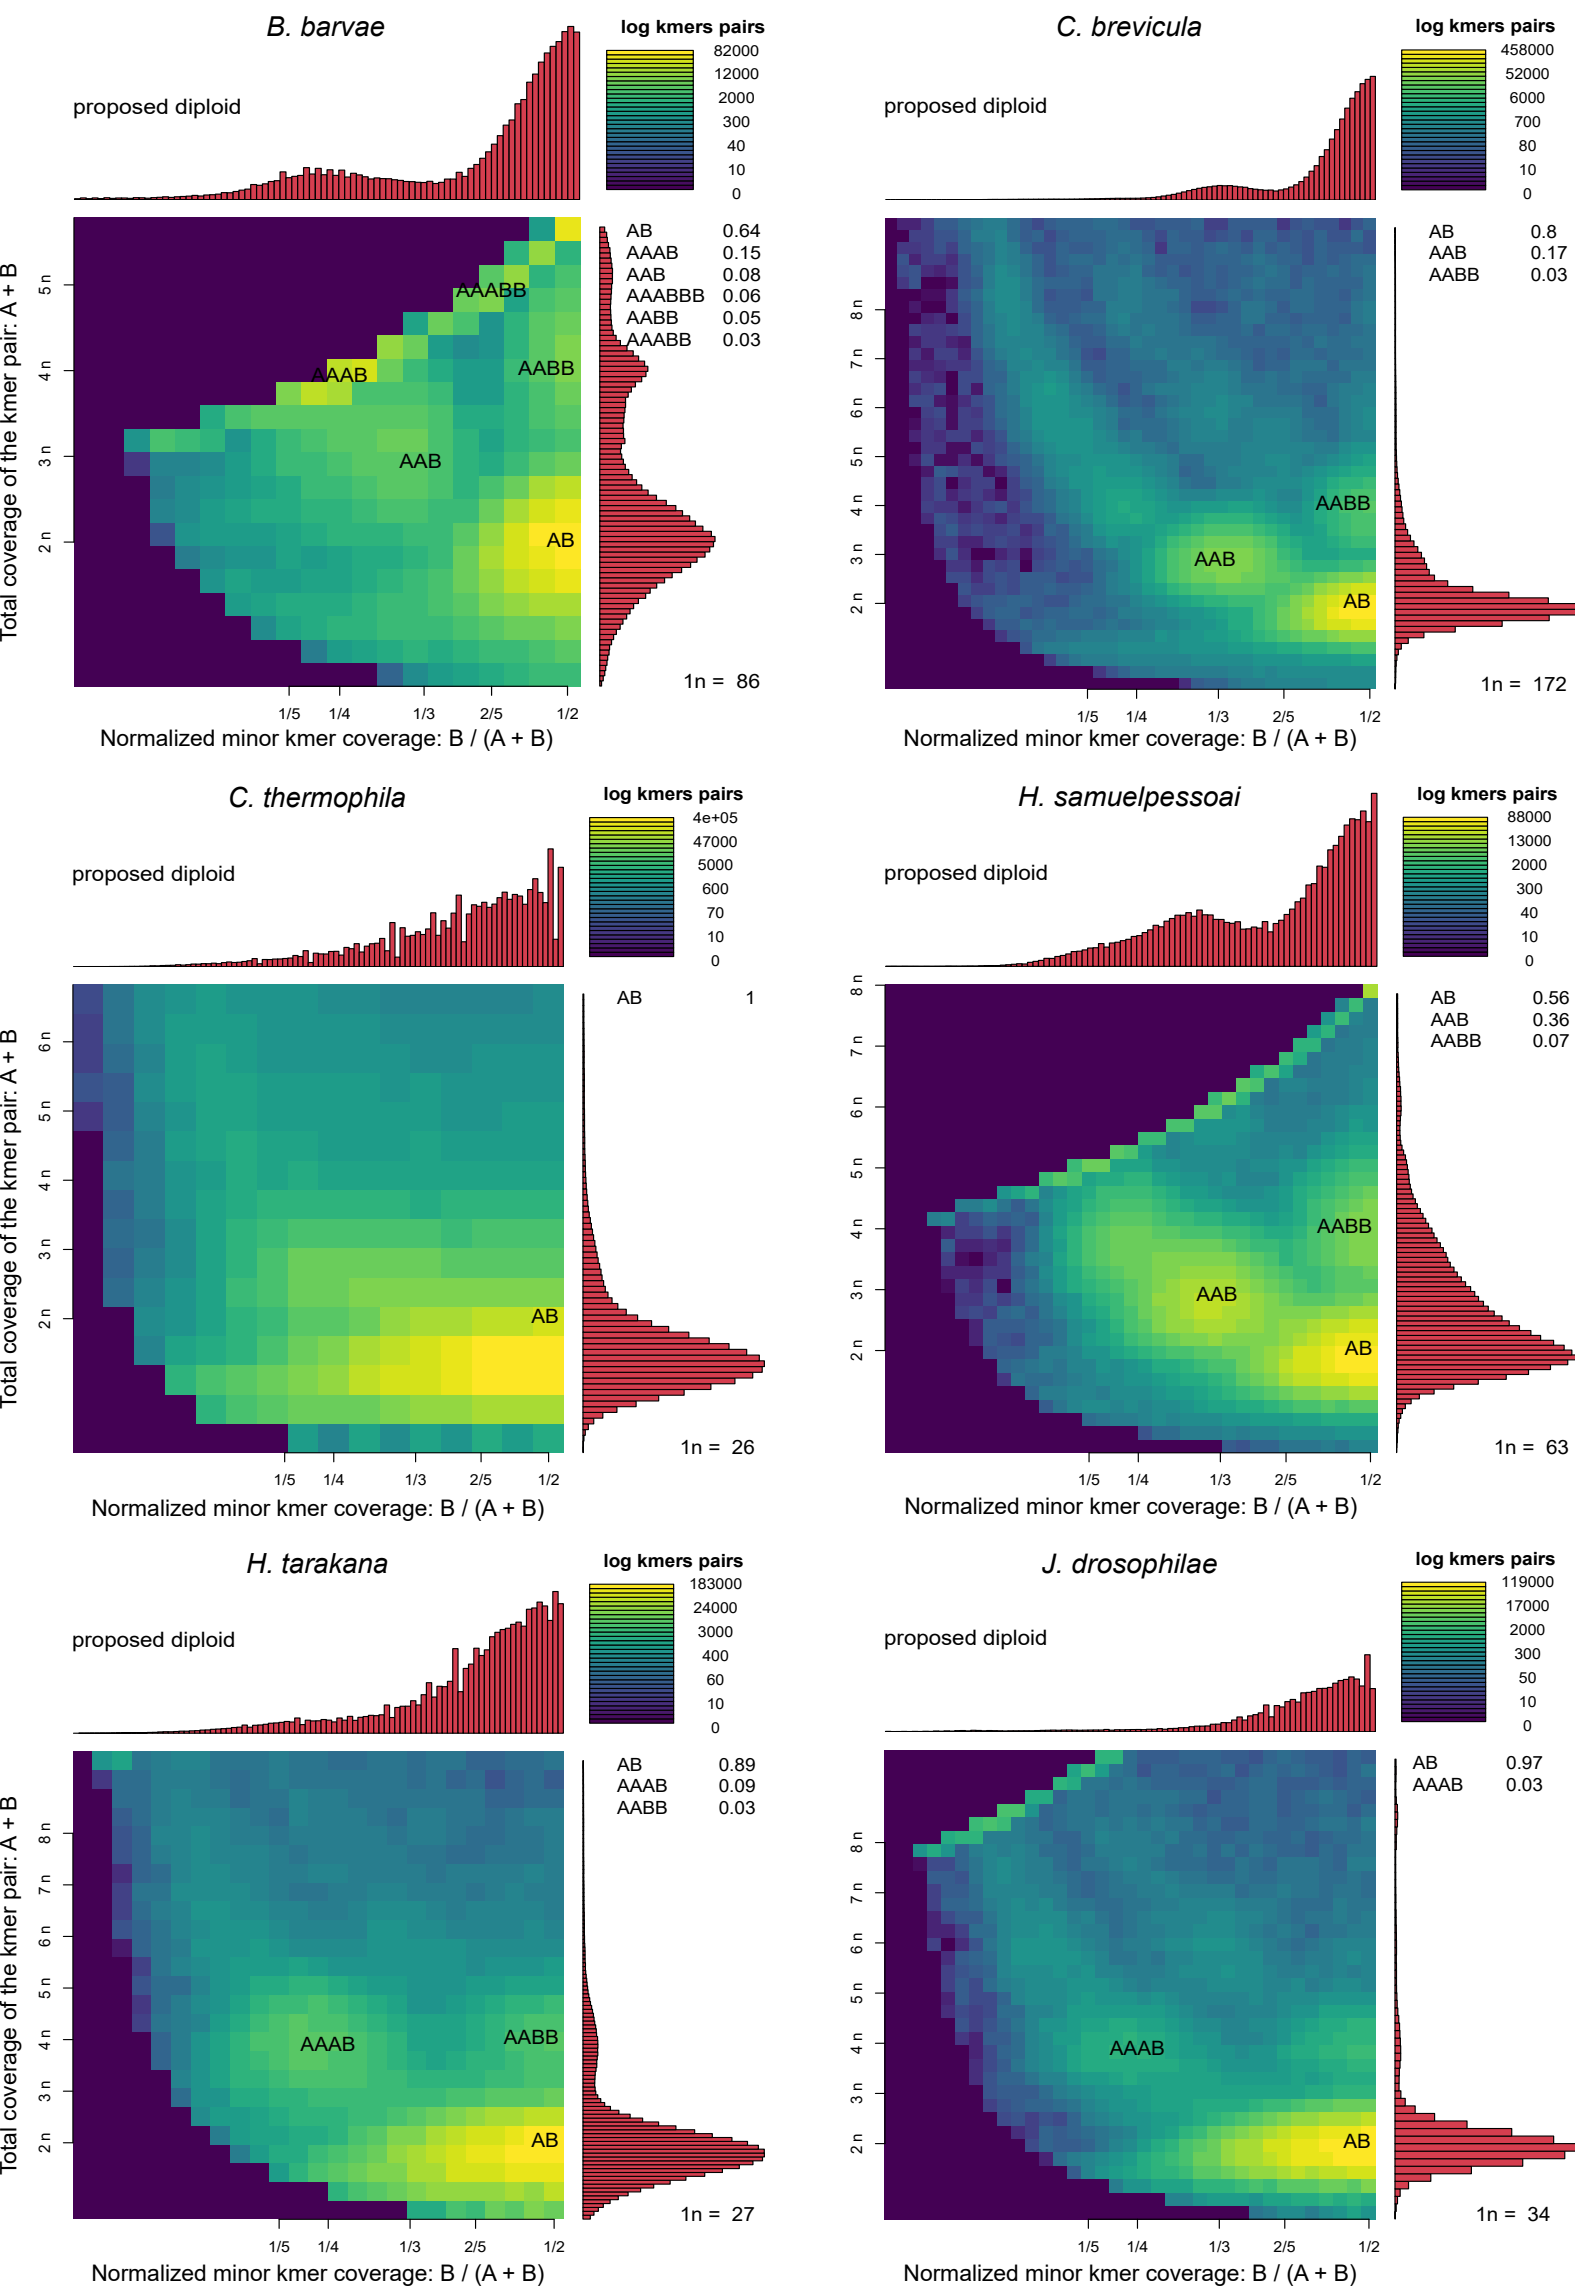

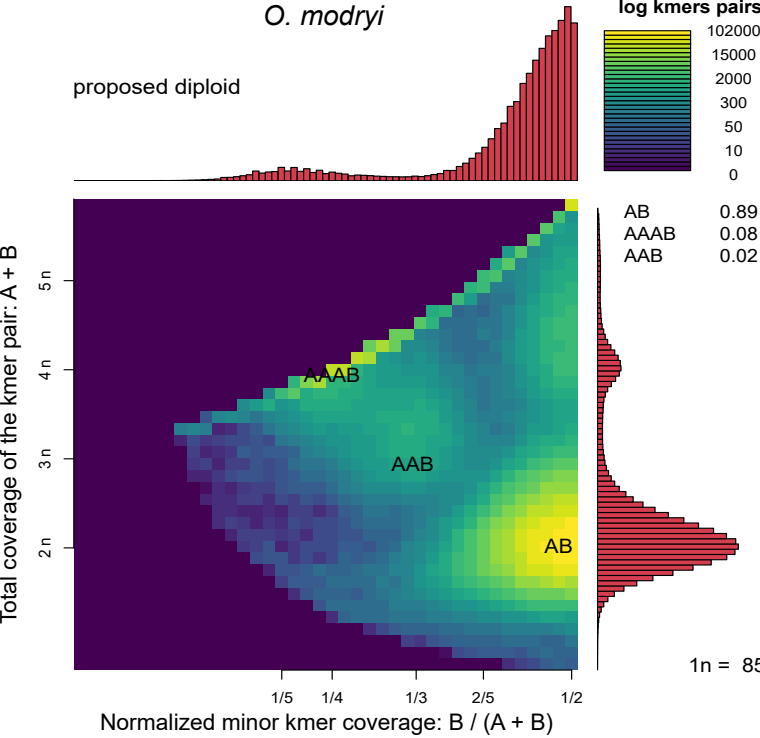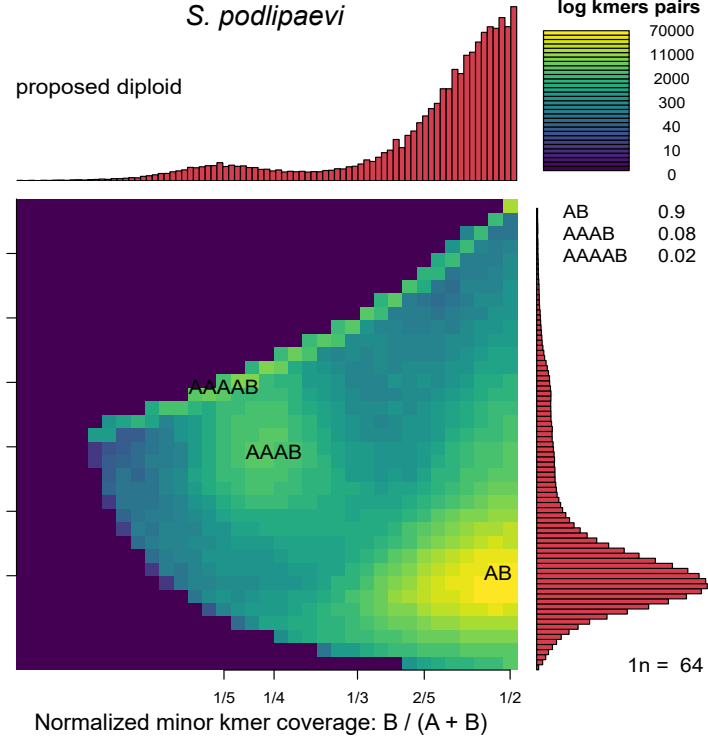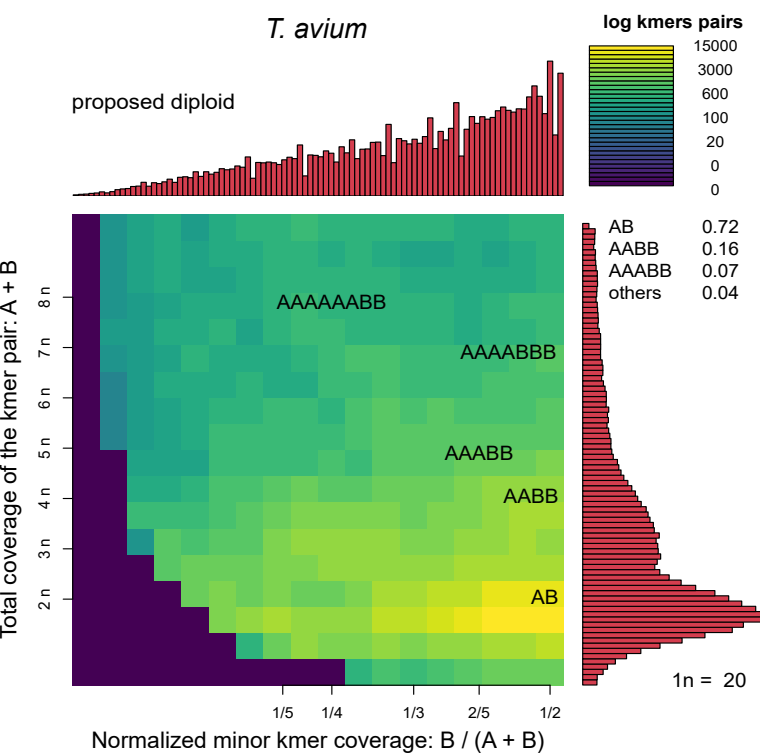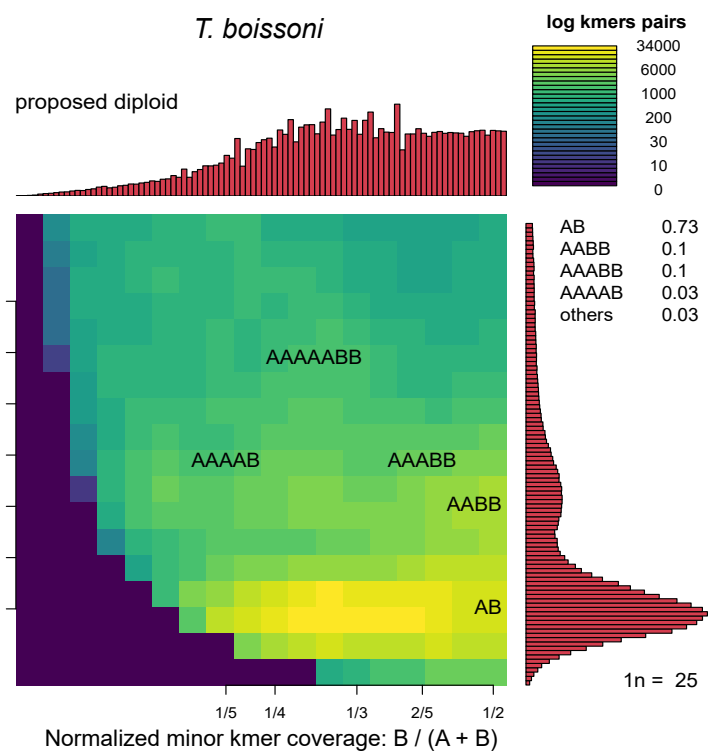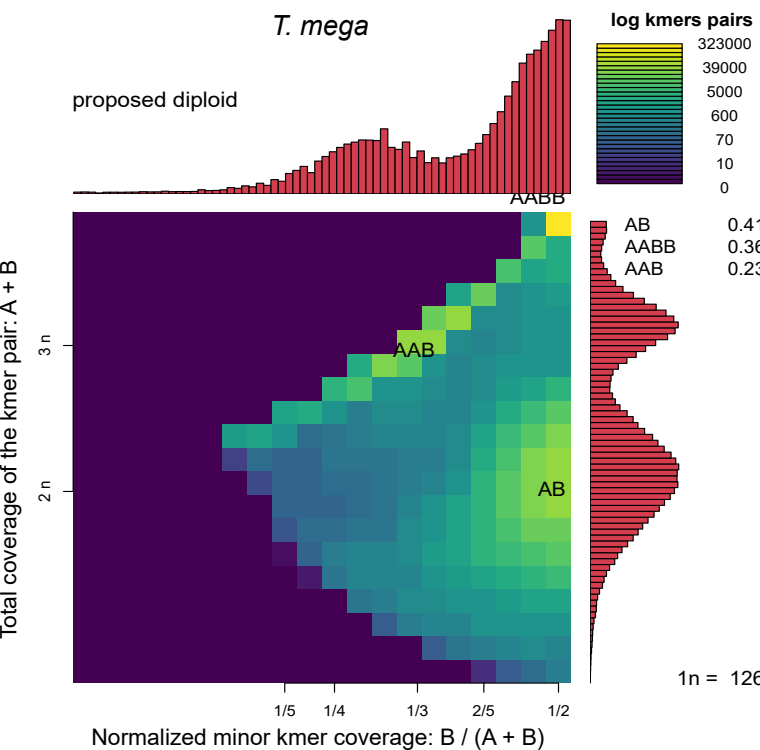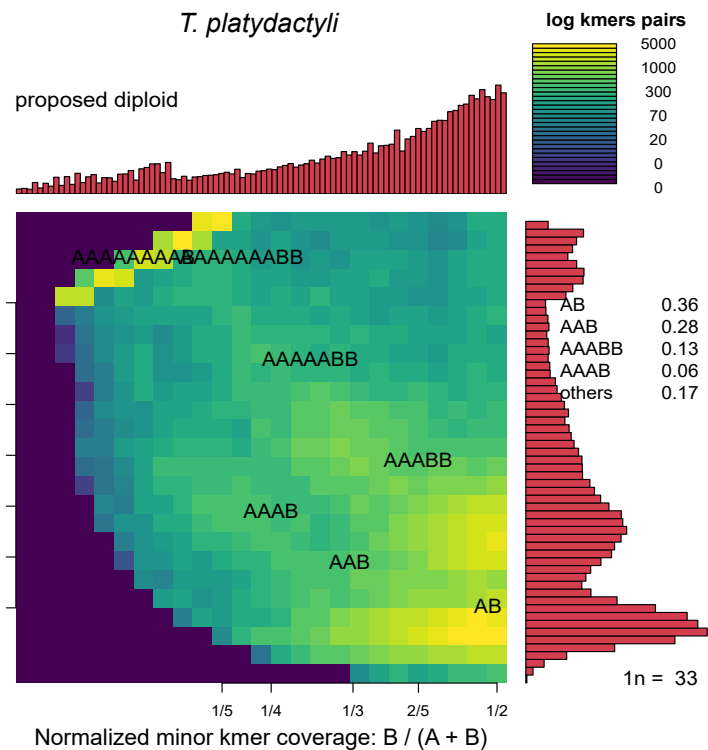

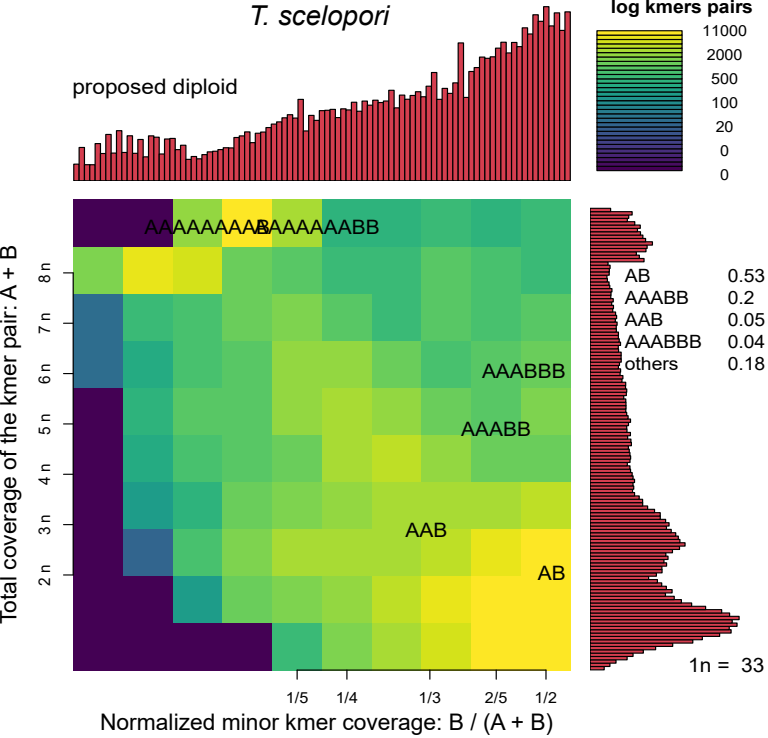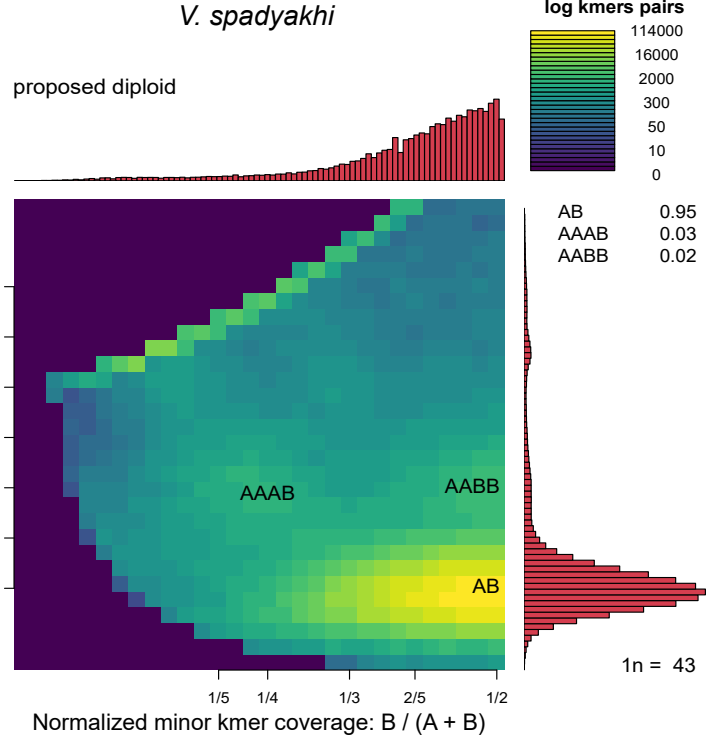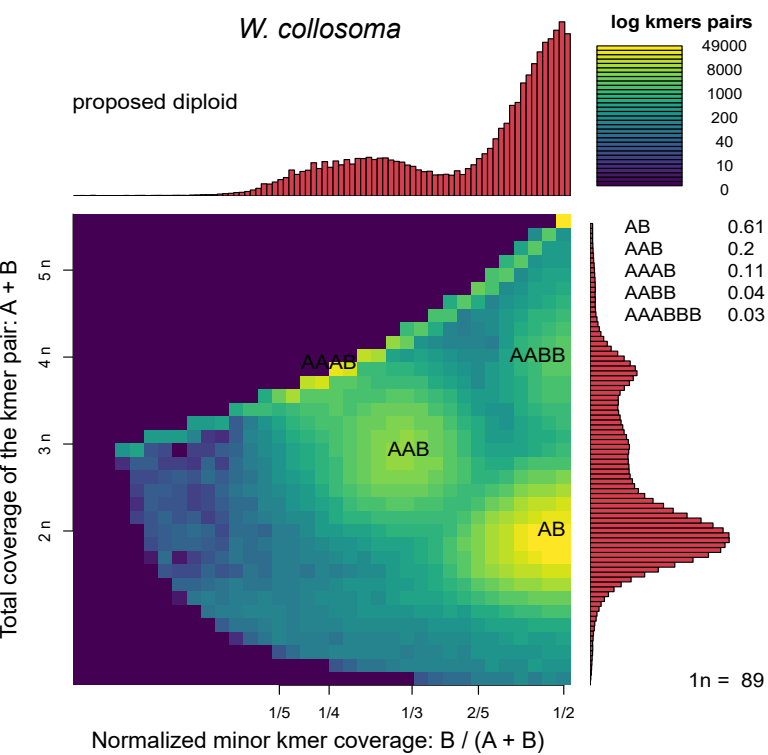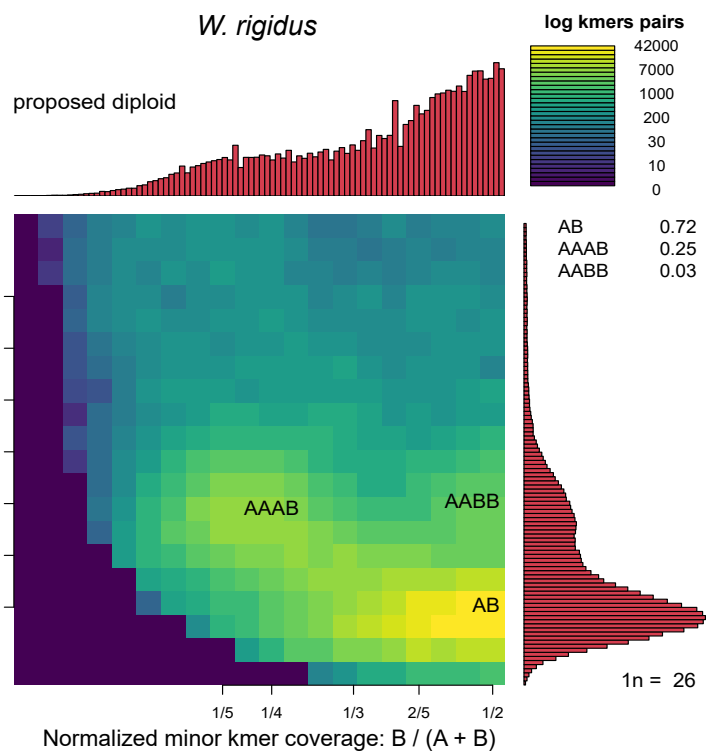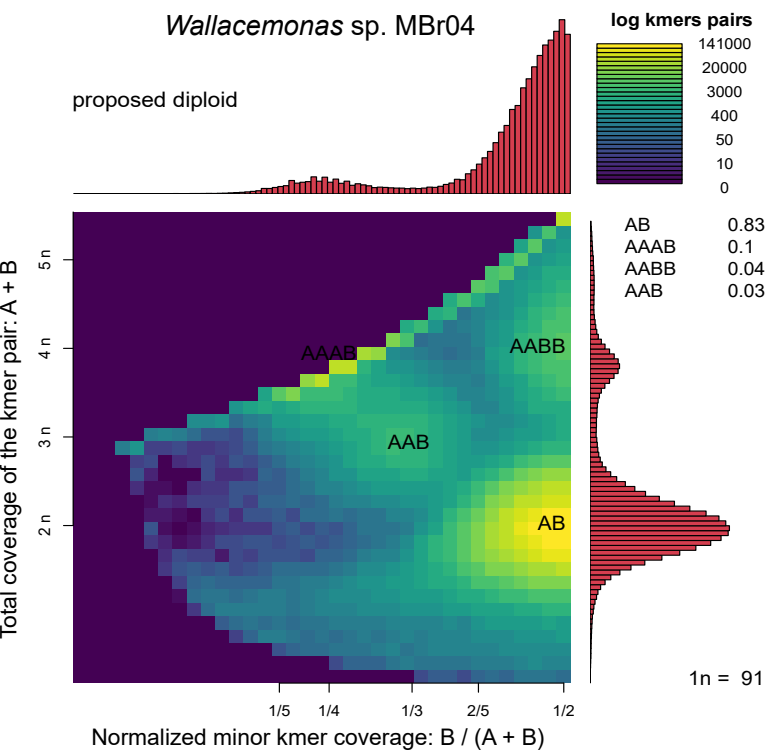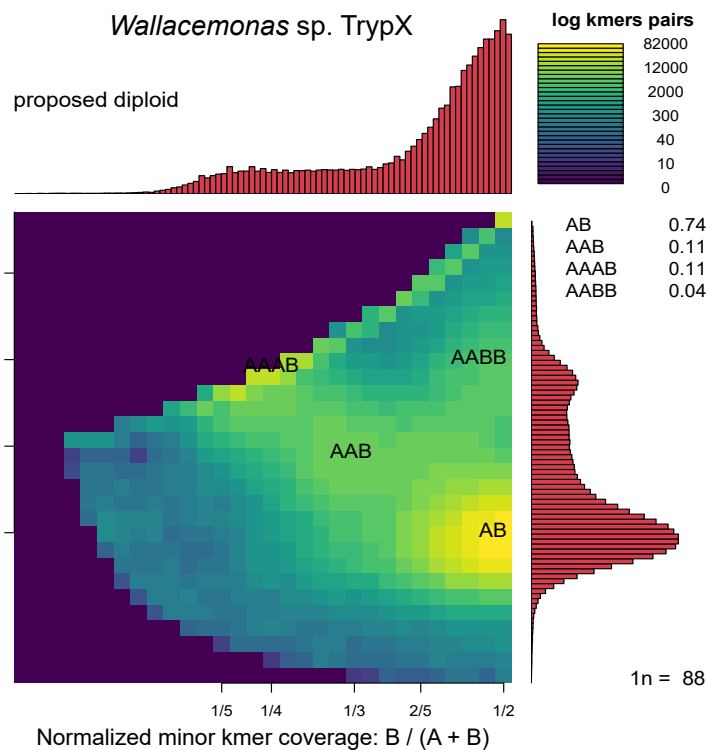

*Wallacemonas* sp. Wsd

proposed diploid

Total coverage of the kmer pair: A + B

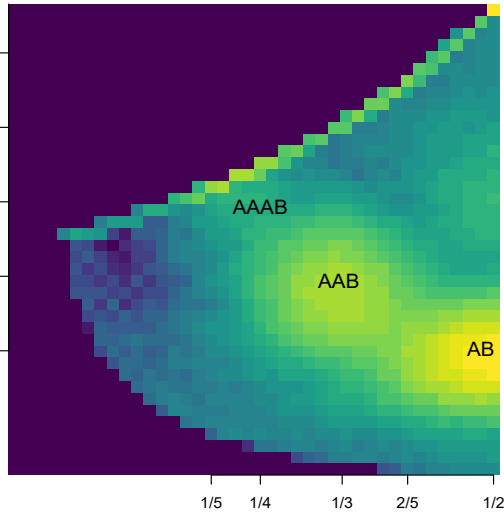

|        |      |
|--------|------|
| AB     | 0.6  |
| AAAB   | 0.35 |
| AAAB   | 0.02 |
| others | 0.02 |

1n = 76

Normalized minor kmer coverage: B / (A + B)

*Wallacemonas* sp. 195SL

proposed diploid

Total coverage of the kmer pair: A + B

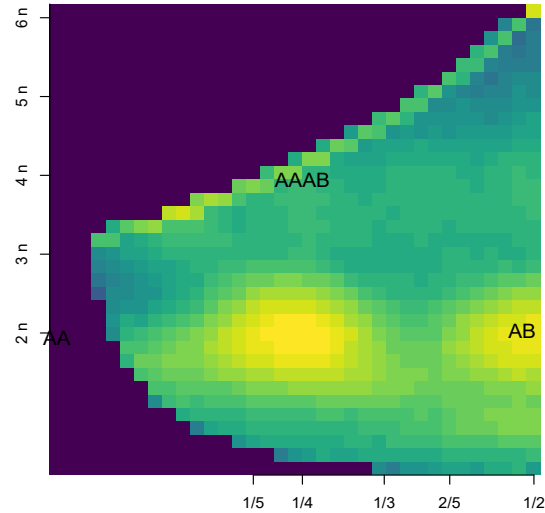

|      |      |
|------|------|
| AA   | 0.7  |
| AB   | 0.26 |
| AAAB | 0.03 |

1n = 81

Normalized minor kmer coverage: B / (A + B)

*Z. costaricensis*

proposed diploid

Total coverage of the kmer pair: A + B

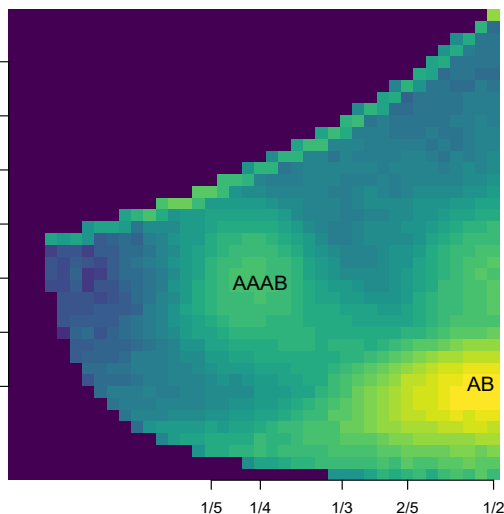

|      |      |
|------|------|
| AB   | 0.95 |
| AAAB | 0.05 |

1n = 56

Normalized minor kmer coverage: B / (A + B)
