# Supplementary material for: Shining the spotlight on the neglected: new high-quality genome assemblies as a gateway to understanding the evolution of Trypanosomatidae
Source: BMC Genomics. 2023 Aug 21;24:471. doi: 10.1186/s12864-023-09591-z (PMC10441713; doi:10.1186/s12864-023-09591-z)
Supplement: Supplementary file 1 — Additional file 1. Genome and transcriptome sequencing and assembly statistics. The genomes of C. fasciculata Cf-Cl, L. major Friedlin, T. brucei brucei TREU927 and V. ingenoplastis COLPROT021 are used for comparative purposes. [file 12864_2023_9591_MOESM1_ESM.xlsx]

## Sheet: Online resource 1
Additional file 1. Genome and transcriptome sequencing and assembly statistics. The genomes of C. fasciculata Cf-Cl, L. major Friedlin, T. brucei brucei TREU927 and V. ingenoplastis COLPROT021 are used for comparative purposes.
Genome sequencing	B. barvae	C. brevicula	C. thermophila	H. samuelpessoai	H. tarakana	J. drosophilae	O. modryi	S. podlipaevi	T. avium	T. boissoni	T. mega	T. platydactyli	T. scelopori	V. spadyakhi	W. collosoma	W. rigidus	Wallacemonas sp. MBr04	Wallacemonas sp. TrypX	Wallacemonas sp. Wsd	Wallacemonas sp. 195SL	Z. costaricensis	Published reference genomes
																						C. fasciculata Cf-Cl	L. major Friedlin	T. brucei brucei TREU927	V. ingenoplastis COLPROT-021
Platform	Illumina NovaSeq 6000	Illumina NovaSeq 6000	Illumina NovaSeq 6000	Illumina NovaSeq 6000	Illumina NovaSeq 6000	Illumina NovaSeq 6000	Illumina HiSeq 2500	Illumina NovaSeq 6000	Illumina NovaSeq 6000	Illumina NovaSeq 6000	Illumina NovaSeq 6000 / Illumina Miseq	Illumina NovaSeq 6000	Illumina NovaSeq 6000	Illumina NovaSeq 6000	Illumina NovaSeq 6000	Illumina NovaSeq 6000	Illumina NovaSeq 6000	Illumina NovaSeq 6000	Illumina NovaSeq 6000	Illumina NovaSeq 6000	Illumina NovaSeq 6000	-	-	-	-
Library kit	TruSeq DNA PCR Free	TruSeq DNA PCR-Free	TruSeq DNA PCR-Free	TruSeq DNA PCR-Free	TruSeq DNA PCR-Free	TruSeq DNA PCR-Free	TruSeq DNA PCR-Free	TruSeq DNA PCR Free	TruSeq DNA PCR Free	TruSeq DNA PCR Free	TruSeq DNA PCR Free	TruSeq DNA PCR-Free	TruSeq DNA PCR Free	TruSeq DNA PCR-Free	TruSeq DNA PCR-Free	TruSeq DNA PCR-Free	TruSeq DNA PCR-Free	TruSeq DNA PCR-Free	TruSeq DNA PCR-Free	TruSeq Nano DNA Kit, TruSeq DNA PCR-Free	TruSeq DNA PCR-Free	-	-	-	-
Median insert size, nt	418	460	383	410	482	470	408	279	399	408	413 / 246	423	422	442	414	426	429	418	408	449	420	-	-	-	-
Maximum raw read length, nt	151	151	151	151	151	151	101	151	151	151	151 (1 PE) + 100 (4 PE)	151	151	151	151	151	151	151	151	151	151	-	-	-	-
Number of raw reads	66,735,950	127,914,622	13,930,446	41,650,630	13,932,120	13,931,208	72,717,364	38,885,312	13,829,960	14,102,690	97,096,220	13,910,686	13,651,090	29,010,424	54,896,840	15,298,816	50,018,382	50,791,680	45,925,932	47,495,676	41,268,250	-	-	-	-
Number of trimmed reads	59,513,216	114,463,484	13,235,646	39,782,830	13,074,198	13,455,984	59,933,310	38,117,806	12,844,482	12,863,466	90,009,938	13,450,814	11,664,121	27,812,066	50,040,126	14,120,114	46,120,160	46,805,258	41,560,166	40,891,678	37,881,500	-	-	-	-
Transcriptome sequencing
Sequencing technology	Illumina NovaSeq 6000	Illumina NovaSeq 6000	Illumina NovaSeq 6000	Illumina NovaSeq 6000	Illumina NovaSeq 6000	Illumina NovaSeq 6000	Illumina HiSeq 2500	Illumina NovaSeq 6000	Illumina Novaseq 6000	Illumina Novaseq 6000	Illumina Miseq	Illumina NovaSeq 6000	Illumina Novaseq 6000	Illumina NovaSeq 6000	Illumina NovaSeq 6000	Illumina NovaSeq 6000	Illumina NovaSeq 6000	Illumina NovaSeq 6000	Illumina NovaSeq 6000	Illumina NovaSeq 6000	Illumina NovaSeq 6000	-	-	-	-
Library kit	TruSeq Stranded Total RNA	TruSeq Stranded Total RNA	TruSeq stranded mRNA	TruSeq stranded mRNA	TruSeq stranded mRNA	TruSeq stranded mRNA	TruSeq RNA Sample Prep Kit v2	TruSeq stranded mRNA	TruSeq Stranded Total RNA	TruSeq Stranded Total RNA	TruSeq Stranded Total RNA	TruSeq stranded mRNA	TruSeq Stranded Total RNA	TruSeq Stranded Total RNA	TruSeq stranded mRNA	TruSeq stranded mRNA	TruSeq stranded mRNA	TruSeq stranded mRNA	TruSeq stranded mRNA	TruSeq stranded mRNA	TruSeq stranded mRNA	-	-	-	-
Median insert size, nt	134	141	173	196	190	189	151	238	159	156	178	190	174	182	191	155	193	195	196	152	189	-	-	-	-
Maximum raw read length, nt	151	151	151	151	151	151	101	151	151	151	100	151	151	151	151	151	151	151	151	151	151	-	-	-	-
Number of raw reads	16,564,524	25,740,880	60,533,658	31071712	60272750	59,989,834	57,864,022	50,146,336	29,077,824	19,894,230	92,969,880	60,269,218	19,475,304	19,829,108	40,325,874	36,898,648	37,701,066	37,603,802	35,101,538	41,572,470	31,468,850	-	-	-	-
Number of trimmed reads	15,436,376	24,885,342	57,218,698	29,795,930	55,374,564	57,583,310	56,020,758	46,909,940	27,347,402	18,345,032	91,741,238	57,138,118	1,767,1812	18,426,888	38,243,704	35,778,230	35,560,784	35,592,448	33,036,768	40,282,938	29,781,228	-	-	-	-
Reads mapping back to the assembly, %	98.12	41.96	85.95	94.27	98.97	98.29	96.36	86.57	98.55	95.41	99.53	99.52	95.57	62.53	99.57	99.87	91.65	94.45	94.54	99.61	89.56	-	-	-	-
Genome Assembly*
Short reads assembly strategy	Spades-Platanus	Platanus	Platanus	Platanus	Spades-Platanus	Spades-Platanus	Spades-Platanus	Platanus	Spades-Platanus	Spades-Platanus	Spades-Platanus	Spades-Platanus	Spades-Platanus	Platanus	Spades-Platanus	Spades-Platanus	Platanus	Platanus	Platanus	Spades-Platanus	Platanus	-	-	-	-
Number of scaffolds	1,131	2,026	2,836	2,142	2,891	1661	976	2,275	936	1,438	1,591	916	1,064	1,880	667	614	1,595	1,165	1,322	2,478	3,565	457	36	131	241
Total assembly length, bp	32,901,633	35,360,925	29,959,113	32,248,164	26,680,300	21,372,715	18,243,908	26,884,447	22,090,251	22,199,164	27,412,799	20,548,520	20,296,703	29,272,006	25,685,437	25,860,083	27,675,637	25,354,336	26,367,624	27,286,837	35,312,751	41,267,661	32,855,095	35,826,294	34,303,622
Scaffold N50, bp	181,447	118.647	47,740	128,407	48,834	60,580	68,804	45,748	89,588	84,016	93,921	85,177	59,137	56,565	167,338	231,569	114,404	139,390	103,137	64,548	41,351	920,654	1,091,540	3,542,885	591,028
Largest scaffold, bp	649,288	522,894	313,512	660,147	237,232	272,753	357,143	241,952	37,4357	432,753	413,428	410,898	289,856	240,533	600,384	846,837	458,096	453,884	435,198	291,087	281,720	2,960,390	2,682,151	5,598,354	2,371,769
Total gap length, nt	8,057	6,863	2,018	3,649	11,413	3,484	4,031	3,874	17,098	3,044	1,966	4,092	12,575	2,762	1,252	1,661	1,890	2,490	3,920	5,642	7,993	741	13	9,414	300
Gap percentage, %	0.02	0.02	0.007	0.01	0.04	0.02	0.02	0.01	0.08	0.01	0.01	0.02	0.06	0.01	0.01	0.01	0.01	0.01	0.02	0.02	0.02	0	0	0.03	0
N's per 100 kbp	24.49	19.41	6.74	11.32	42.78	16.30	22.1	14.41	77.40	13.71	7.17	19.91	61.96	9.44	4.87	6.42	6.83	9.82	14.87	20.68	22.63	1.80	0.04	26.28	0.87
Reads mapping back on the assembly, %	99.76	94.89	85.56	100	98.43	98.79	94.93	87.17	98.37	98.62	99.62	99.15	98.97	91.76	98.69	99.42	95.31	95.63	94.45	98.55	89.5	-	-	-	-
SNP number (indels excluded)	37,047	289,423	189,398	118,540	115,665	107,302	110,891	86,803	10,393	31,539	21,807	7,177	5,037	104,921	56,301	24,670	120,412	76,306	80,024	84,923	254,508	-	-	-	-
Homozygous SNPs per 100 kb of sequence	0.41	0.73	1.28	0.42	1.11	0.76	1.31	0.70	0.59	1.06	0.52	0.77	0.68	1.49	0.53	0.61	0.72	0.32	0.43	1.84	1.20	-	-	-	-
GC%	55.40	53.43	54.07	56.37	61.24	54.34	61.13	48.31	31.23	46.06	44.16	48.82	52.12	46.77	57.17	57.11	57.67	58.95	59.10	54.64	64.03	57.03	59.72	45.49	53.42
Total length of the transcribed sequence, bp	23259862	30040791	26945865	28675503	25632907	20653380	17876884	25138731	21961943	21758059	24633382	19859266	20272802	26608962	23729289	23640399	24490626	23351747	23907246	23696664	32762833	-	-	-	-
Transcribed proportion of the assemlby, %	70.7	84.95	89.94	88.92	96.07	96.63	97.99	93.51	99.42	98.01	89.86	96.65	99.88	90.9	92.38	91.42	88.49	92.1	90.67	86.84	92.78	-	-	-	-
Genome completeness (%) estimated using KAT	99.04	Unknown	Unknown	98.44	96.74	98.2	97.41	98.06	97.75	97.25	98.34	98.89	98.79	97.15	98.89	99.22	98.76	98.99	98.88	98.7	97.57	-	-	-	-
BUSCO genome completeness (eukaryota_odb10)
Complete BUSCOs, %	52.6	54.9	54.1	53	52.2	53.7	45.5	53.4	55.3	57.7	53.4	53.8	55.7	46.3	53.7	54.1	52.6	55.3	53.7	56.1	51	52.2	53.8	55.7	49.4
Single-copy, %	51.4	52.5	52.9	51	51	52.9	44.3	51.8	54.1	56.5	51.4	51.8	54.1	45.1	52.5	52.9	51.4	54.5	52.5	54.9	50.2	45.9	52.2	49	46.3
Duplicated, %	1.2	2.4	1.2	2	1.2	0.8	1.2	1.6	1.2	1.2	2	2	1.6	1.2	1.2	1.2	1.2	0.8	1.2	1.2	0.8	6.3	1.6	6.7	3.1
Fragmented BUSCOs, %	10.2	8.6	8.6	9.4	11.8	7.8	11.8	10.2	8.6	7.8	10.6	9.4	9	11.8	11.8	11	12.5	8.6	10.6	9	9.8	9.8	9.4	8.2	9
Missing BUSCOs, %	37.2	36.5	37.3	37.6	36	38.5	42.7	36.4	36.1	34.5	36	36.8	35.3	41.9	34.5	34.9	34.9	36.1	35.7	34.9	39.2	38	36.8	36.1	41.6
BUSCO genome completeness (euglenozoa_odb10)**
Complete BUSCOs, %	100	97.7	97.7	98.5	96.9	99.3	92.3	97.7	99.2	99.2	100	100	99.2	95.4	99.2	98.5	98.5	99.2	99.2	99.2	97.7	98.4	100	99.2	94.6
Single-copy, %	100	95.4	97.7	98.5	96.9	98.5	92.3	97.7	99.2	99.2	0	100	99.2	94.6	99.2	98.5	98.5	99.2	99.2	99.2	97.7	86.9	0	90	91.5
Duplicated, %	0	2.3	0	0	0	0.8	0	0	0	0	0	0	0	0.8	0	0	0	0	0	0	0	11.5	0	9.2	3.1
Fragmented BUSCOs, %	0	0	0.8	1.5	2.3	0	2.3	1.5	0.8	0.8	0	0	0.8	3.1	0.8	1.5	0.8	0.8	0	0.8	0.8	1.5	0	0.8	3.8
Missing BUSCOs, %	0	2.3	1.5	0	0.8	0.7	5.4	0.8	0	0	0	0	0	1.5	0	0	0	0	0.8	0	1.5	0.1	0	0	1.6
*Only scaffolds ≥ 500 nt are considered
**Higher BUSCO genome completeness scores when using euglenozoa_odb10 than eukaryota_odb10 can be attributed to the differences in the reference database composition
