# Supplementary material for: Shining the spotlight on the neglected: new high-quality genome assemblies as a gateway to understanding the evolution of Trypanosomatidae
Source: BMC Genomics. 2023 Aug 21;24:471. doi: 10.1186/s12864-023-09591-z (PMC10441713; doi:10.1186/s12864-023-09591-z)
Supplement: Supplementary file 5 — Additional file 5. Somy levels and repeat content for 50 longest scaffolds from the genome assemblies obtained in this study. [file 12864_2023_9591_MOESM5_ESM.xlsx]

## Sheet: Página1
Additional file 5. Somy levels and repeat content for 50 longest scaffolds from the genome assemblies obtained in this study.
	Borovskyia barvae								Crithidia brevicula								Crithidia thermophila								H. samuelpessoai								H. tarakana								Jaenimonas drosophilae								Obscuromonas modryi
Median genome coverage:	210.07								354.25								42.41								138.08								58.62								71.69								237.68
Mean genome coverage:	223.34								364.51								42.49								141.96								58.86								73.6								243.64
#	Scaffold ID	Scaffold length	coverage median-of-means of 1kb windows	R = scaf. median-of-means/median genome coverage	Somy	Total repeat length, bp	Percentage of repeats of total scaffold length, %	Percentage of repeats of total repeat length in the whole genome, %	Scaffold ID	Scaffold length	coverage median-of-means of 1kb windows	R = scaf. median-of-means/median genome coverage	Somy	Total repeat length, bp	Percentage of repeats of total scaffold length, %	Percentage of repeats of total repeat length in the whole genome, %	Scaffold ID	Scaffold length	coverage median-of-means of 1kb windows	R = scaf. median-of-means/median genome coverage	Somy	Total repeat length, bp	Percentage of repeats of total scaffold length, %	Percentage of repeats of total repeat length in the whole genome, %	Scaffold ID	Scaffold length	coverage median-of-means of 1kb windows	R = scaf. median-of-means/median genome coverage	Somy	Total repeat length, bp	Percentage of repeats of total scaffold length, %	Percentage of repeats of total repeat length in the whole genome, %	Scaffold ID	Scaffold length	coverage median-of-means of 1kb windows	R = scaf. median-of-means/median genome coverage	Somy	Total repeat length, bp	Percentage of repeats of total scaffold length, %	Percentage of repeats of total repeat length in the whole genome, %	Scaffold ID	Scaffold length	coverage median-of-means of 1kb windows	R = scaf. median-of-means/median genome coverage	Somy	Total repeat length, bp	Percentage of repeats of total scaffold length, %	Percentage of repeats of total repeat length in the whole genome, %	Scaffold ID
1	Scaf_1131	649288	201.9	0.961108202027896	2n	12454	1.92	0.62	Scaf_2026	522894	339.13	0.957318278052223	2n	14,680	2.81	0.45	Scaf_2836	313512	43.7	1.03041735439755	2n	16,746	5.34	1.16	Scaf_2142	660147	130.28	0.94351100811124	2n	11,104	1.68	0.69	Scaf_2891	237232	58.065	0.990532241555783	2n	10,882	4.59	0.53	Scaf_1661	272753	73.55	1.02594504114939	2n	8,494	3.11	0.77	Scaf_993
2	Scaf_1130	614724	201.25	0.958013995334888	2n	14513	2.36	0.72	Scaf_2025	464926	339.65	0.95878616796048	2n	11,454	2.46	0.35	Scaf_2835	205159	45.025	1.06165998585239	2n	10,965	5.34	0.76	Scaf_2141	603391	131.905	0.955279548088065	2n	9,614	1.59	0.6	Scaf_2890	222137	57.17	0.975264414875469	2n	9,681	4.36	0.47	Scaf_1660	260784	71.16	0.992607058167108	2n	3,255	1.25	0.29	Scaf_992
3	Scaf_1129	573932	212.535	1.01173418384348	2n	15852	2.76	0.79	Scaf_2024	427662	356.6	1.00663373323924	2n	19,428	4.54	0.59	Scaf_2834	194028	44.59	1.05140297099741	2n	8,626	4.45	0.6	Scaf_2140	499604	126.225	0.914143974507532	2n	7,067	1.41	0.44	Scaf_2889	208219	56.33	0.960934834527465	2n	12,198	5.86	0.59	Scaf_1659	254787	72.43	1.01032222067234	2n	5,932	2.33	0.54	Scaf_991
4	Scaf_1128	565017	200.32	0.953586899604894	2n	12781	2.26	0.64	Scaf_2023	417800	338.14	0.954523641496118	2n	12,685	3.04	0.39	Scaf_2833	192452	43.98	1.03701957085593	2n	5,696	2.96	0.39	Scaf_2139	463472	140.28	1.01593279258401	2n	9,045	1.95	0.56	Scaf_2888	200818	58.31	0.994711702490618	2n	8,068	4.02	0.39	Scaf_1658	252901	71.5	0.997349700097643	2n	6,025	2.38	0.54	Scaf_990
5	Scaf_1127	547648	317.075	1.50937782643881	3n	18383	3.36	0.92	Scaf_2022	414224	336.92	0.951079745942131	2n	14,408	3.48	0.44	Scaf_2832	188821	42.9	1.01155387880217	2n	9,419	4.99	0.65	Scaf_2138	408218	148.3	1.07401506373117	2n	21,698	5.32	1.35	Scaf_2887	196885	59.91	1.02200614124872	2n	11,708	5.95	0.56	Scaf_1657	237906	70.865	0.988492118845027	2n	4,620	1.94	0.42	Scaf_989
6	Scaf_1126	488593	201.04	0.957014328557148	2n	14883	3.05	0.74	Scaf_2021	368330	341.98	0.965363443895554	2n	24,496	6.65	0.74	Scaf_2831	186475	42.66	1.00589483612356	2n	8,131	4.36	0.56	Scaf_2137	407547	131.91	0.955315758980301	2n	7,009	1.72	0.44	Scaf_2886	175366	58.77	1.00255885363357	2n	6,476	3.69	0.31	Scaf_1656	236535	71.35	0.995257358069466	2n	2,826	1.19	0.26	Scaf_988
7	Scaf_1125	467608	221.365	1.05376779168848	2n	30379	6.5	1.51	Scaf_2020	363770	359.68	1.01532815808045	2n	28,410	7.81	0.86	Scaf_2830	175393	41.33	0.974534307946239	2n	4,886	2.79	0.34	Scaf_2136	368585	136.7	0.990005793742758	2n	10,717	2.91	0.67	Scaf_2885	167089	56.075	0.956584783350392	2n	12,031	7.2	0.58	Scaf_1655	214490	71.94	1.00348723671363	2n	4,780	2.23	0.43	Scaf_987
8	Scaf_1124	450486	207.52	0.987861189127434	2n	11810	2.62	0.59	Scaf_2019	352651	363.64	1.02650670430487	2n	25,540	7.24	0.78	Scaf_2829	162561	44.59	1.05140297099741	2n	5,296	3.26	0.37	Scaf_2135	352177	144.95	1.04975376593279	2n	19,885	5.65	1.24	Scaf_2884	163586	58.39	0.996076424428523	2n	5,043	3.08	0.24	Scaf_1654	202373	72.33	1.00892732598689	2n	4,184	2.07	0.38	Scaf_986
9	Scaf_1123	432905	208.3	0.991574237159042	2n	20031	4.63	1	Scaf_2018	346124	345.68	0.975808045165843	2n	15,832	4.57	0.48	Scaf_2828	160271	42.4	0.999764206555058	2n	3,620	2.26	0.25	Scaf_2134	342119	129	0.934241019698725	2n	6,297	1.84	0.39	Scaf_2883	152608	57.32	0.977823268509041	2n	7,947	5.21	0.38	Scaf_1653	199147	72.085	1.00550983400753	2n	8,196	4.12	0.74	Scaf_985
10	Scaf_1122	424358	199.85	0.95134955014995	2n	9707	2.29	0.48	Scaf_2017	325673	350.355	0.989004940014114	2n	8,300	2.55	0.25	Scaf_2827	158596	43.61	1.02829521339307	2n	8,871	5.59	0.61	Scaf_2133	342045	140.84	1.01998841251448	2n	12,187	3.56	0.76	Scaf_2882	151208	108.235	1.84638348686455	4n	9,618	6.36	0.46	Scaf_1652	190579	70.42	0.982284837494769	2n	1,343	0.7	0.12	Scaf_984
11	Scaf_1121	412817	206.22	0.98167277574142	2n	19757	4.79	0.98	Scaf_2016	309659	343.635	0.970035285815102	2n	8,732	2.82	0.27	Scaf_2826	156016	44.07	1.03914171186041	2n	6,797	4.36	0.47	Scaf_2132	333909	130.165	0.942678157589803	2n	5,412	1.62	0.34	Scaf_2881	147043	60.605	1.03386216308427	2n	7,269	4.94	0.35	Scaf_1651	177115	72.435	1.01039196540661	2n	3,181	1.8	0.29	Scaf_983
12	Scaf_1120	386812	208.37	0.991907459418289	2n	15727	4.07	0.78	Scaf_2015	308948	350.92	0.99059985885674	2n	17,654	5.71	0.54	Scaf_2825	155642	40.97	0.966045743928319	2n	6,668	4.28	0.46	Scaf_2131	321677	130.16	0.942641946697566	2n	10,783	3.35	0.67	Scaf_2880	144999	57.65	0.9834527465029	2n	9,976	6.88	0.48	Scaf_1650	173531	70.105	0.977890919235598	2n	2,358	1.36	0.21	Scaf_982
13	Scaf_1119	346344	213.17	1.01475698576665	2n	19607	5.66	0.98	Scaf_2014	308406	521.46	1.47201129146083	3n	19,494	6.32	0.59	Scaf_2824	155172	44.235	1.04303230370196	2n	4,032	2.6	0.28	Scaf_2130	306732	147.9	1.07111819235226	2n	13,549	4.42	0.84	Scaf_2879	144167	59.99	1.02337086318663	2n	9,114	6.32	0.44	Scaf_1649	172841	73.06	1.01911005719068	2n	10,875	6.29	0.98	Scaf_981
14	Scaf_1118	339104	207.13	0.986004665111629	2n	8958	2.64	0.45	Scaf_2013	301783	358.985	1.01336626676076	2n	9,758	3.23	0.3	Scaf_2823	148904	43.05	1.0150907804763	2n	7,406	4.97	0.51	Scaf_2129	303621	131.67	0.953577636152955	2n	7,268	2.39	0.45	Scaf_2878	141030	57.715	0.984561583077448	2n	6,079	4.31	0.29	Scaf_1648	172103	71.31	0.994699400195285	2n	1,521	0.88	0.14	Scaf_980
15	Scaf_1117	325096	198.885	0.946755843290332	2n	12600	3.88	0.63	Scaf_2012	291368	350.2	0.988567395906845	2n	8,022	2.75	0.24	Scaf_2822	148875	43.51	1.02593727894365	2n	6,149	4.13	0.42	Scaf_2128	294599	146.73	1.06264484356895	2n	24,568	8.34	1.53	Scaf_2877	139382	57.465	0.980296827021494	2n	8,968	6.43	0.43	Scaf_1647	164276	71.91	1.00306876830799	2n	6,791	4.13	0.61	Scaf_979
16	Scaf_1116	311677	308.245	1.4673442185938	3n	24829	7.97	1.24	Scaf_2011	287662	351.92	0.993422724064926	2n	9,883	3.44	0.3	Scaf_2821	137262	41.79	0.985380806413582	2n	3,465	2.52	0.24	Scaf_2127	292275	128.09	0.927650637311703	2n	4,941	1.69	0.31	Scaf_2876	135509	58.805	1.00315591948141	2n	9,498	7.01	0.46	Scaf_1646	156524	72.38	1.00962477332961	2n	2,836	1.81	0.26	Scaf_978
17	Scaf_1115	310315	200.67	0.955253010901128	2n	21498	6.93	1.07	Scaf_2010	275947	348.575	0.983980239943543	2n	15,242	5.52	0.46	Scaf_2820	137179	43.04	1.01485498703136	2n	4,305	3.14	0.3	Scaf_2126	288160	147.85	1.0707560834299	2n	18,708	6.49	1.16	Scaf_2875	132608	61.94	1.05663596042306	2n	7,397	5.58	0.36	Scaf_1645	155922	71.525	0.997698423769005	2n	3,780	2.42	0.34	Scaf_977
18	Scaf_1114	301202	217.88	1.03717808349598	2n	20100	6.67	1	Scaf_2009	272474	342.99	0.968214537755822	2n	8,711	3.2	0.26	Scaf_2819	134629	32.95	0.77693940108465	2n	5,321	3.95	0.37	Scaf_2125	282016	129.1	0.934965237543453	2n	4,705	1.67	0.29	Scaf_2874	131910	58.62	1	2n	4,766	3.61	0.23	Scaf_1644	152559	69.58	0.970567722136979	2n	917	0.6	0.08	Scaf_976
19	Scaf_1113	296787	305.01	1.45194458989861	3n	17622	5.94	0.88	Scaf_2008	272352	400.8	1.13140437544107	2n	18,485	6.79	0.56	Scaf_2818	133069	43.015	1.01426550341901	2n	3,918	2.94	0.27	Scaf_2124	261110	133.88	0.969582850521437	2n	7,117	2.73	0.44	Scaf_2873	126437	55.69	0.950017059024224	2n	8,751	6.92	0.42	Scaf_1643	148065	71.02	0.990654205607477	2n	1,729	1.17	0.16	Scaf_975
20	Scaf_1112	295436	202.915	0.965939924786976	2n	6108	2.07	0.3	Scaf_2007	269645	340.77	0.961947776993648	2n	7,230	2.68	0.22	Scaf_2817	131761	41.97	0.989625088422542	2n	3,460	2.63	0.24	Scaf_2123	256208	132.76	0.961471610660487	2n	4,486	1.75	0.28	Scaf_2872	125909	57.27	0.976970317297851	2n	8,242	6.55	0.4	Scaf_1642	137292	70.955	0.989747524061933	2n	3,145	2.29	0.28	Scaf_974
21	Scaf_1111	295251	204.34	0.972723377921645	2n	5871	1.99	0.29	Scaf_2006	262223	363.28	1.02549047282992	2n	14,792	5.64	0.45	Scaf_2816	126482	44.97	1.06036312190521	2n	4,872	3.85	0.34	Scaf_2122	255876	131.13	0.949666859791425	2n	7,641	2.99	0.48	Scaf_2871	125763	59.895	1.02175025588536	2n	6,667	5.3	0.32	Scaf_1641	135759	71.245	0.993792718649742	2n	869	0.64	0.08	Scaf_973
22	Scaf_1110	288882	207.51	0.987813585947541	2n	7107	2.46	0.35	Scaf_2005	259835	356.17	1.00541990119972	2n	9,513	3.66	0.29	Scaf_2815	125939	42.305	0.997524168828107	2n	5,558	4.41	0.38	Scaf_2121	251807	138.485	1.00293308227115	2n	4,208	1.67	0.26	Scaf_2870	124331	59.3	1.01160013647219	2n	4,833	3.89	0.23	Scaf_1640	135212	74.05	1.03291951457665	2n	1,452	1.07	0.13	Scaf_972
23	Scaf_1109	286217	201.95	0.961346217927357	2n	18770	6.56	0.94	Scaf_2004	258856	359.67	1.01529992942837	2n	11,891	4.59	0.36	Scaf_2814	124163	41.05	0.967932091487857	2n	3,870	3.12	0.27	Scaf_2120	246997	177.08	1.2824449594438	3n	12,955	5.25	0.81	Scaf_2869	123910	58.37	0.995735243944046	2n	7,793	6.29	0.38	Scaf_1639	135209	71.165	0.992676802901381	2n	8,769	6.49	0.79	Scaf_971
24	Scaf_1108	280889	195.94	0.932736706812015	2n	12157	4.33	0.61	Scaf_2003	251182	364.77	1.02969654199012	2n	8,948	3.56	0.27	Scaf_2813	120994	41.42	0.976656448950719	2n	3,506	2.9	0.24	Scaf_2119	230726	144.26	1.04475666280417	2n	6,460	2.8	0.4	Scaf_2868	123535	59.56	1.01603548277039	2n	13,815	11.18	0.67	Scaf_1638	134090	72.03	1.00474264193053	2n	4,871	3.63	0.44	Scaf_970
25	Scaf_1107	280442	213.01	1.01399533488837	2n	17212	6.14	0.86	Scaf_2002	239405	358.69	1.01253352152435	2n	23,065	9.63	0.7	Scaf_2812	120088	42.7	1.00683800990332	2n	2,895	2.41	0.2	Scaf_2118	225415	152.35	1.10334588644264	2n	6,169	2.74	0.38	Scaf_2867	122338	58.08	0.99078812691914	2n	8,863	7.24	0.43	Scaf_1637	133941	70.655	0.98556284000558	2n	1,759	1.31	0.16	Scaf_969
26	Scaf_1106	271292	197.955	0.942328747560337	2n	11045	4.07	0.55	Scaf_2001	225936	361.82	1.02136908962597	2n	10,319	4.57	0.31	Scaf_2811	117524	31.6	0.745107286017449	n	4,062	3.46	0.28	Scaf_2117	224729	181.09	1.31148609501738	3n	4,673	2.08	0.29	Scaf_2866	119898	55.115	0.940208120095531	2n	6,879	5.74	0.33	Scaf_1636	132578	70.61	0.984935137397127	2n	1,460	1.1	0.13	Scaf_968
27	Scaf_1105	270909	342.93	1.63245584805065	3n	18932	6.99	0.94	Scaf_2000	224423	362.6	1.02357092448836	2n	11,846	5.28	0.36	Scaf_2810	115110	44.51	1.04951662343787	2n	3,418	2.97	0.24	Scaf_2116	217959	139.285	1.00872682502897	2n	10,945	5.02	0.68	Scaf_2865	118375	59.73	1.01893551688843	2n	5,305	4.48	0.26	Scaf_1635	132212	71.6	0.998744594783094	2n	2,776	2.1	0.25	Scaf_967
28	Scaf_1104	269644	205.02	0.97596039415433	2n	5896	2.19	0.29	Scaf_1999	224264	345.14	0.974283697953423	2n	6,754	3.01	0.21	Scaf_2809	115080	41.74	0.984201839188871	2n	2,837	2.47	0.2	Scaf_2115	217566	135.445	0.980916859791425	2n	7,005	3.22	0.44	Scaf_2864	115621	56.605	0.965626066189014	2n	5,208	4.5	0.25	Scaf_1634	132138	71.76	1.00097642627982	2n	1,135	0.86	0.1	Scaf_966
29	Scaf_1103	260214	219.14	1.04317608416242	2n	11163	4.29	0.56	Scaf_1998	217362	357.71	1.00976711362032	2n	12,032	5.54	0.37	Scaf_2808	112130	43.24	1.01957085593021	2n	3,548	3.16	0.24	Scaf_2114	216013	147.83	1.07061123986095	2n	5,838	2.7	0.36	Scaf_2863	115077	58.69	1.00119413169567	2n	6,638	5.77	0.32	Scaf_1633	129893	71.455	0.99672199748919	2n	2,843	2.19	0.26	Scaf_965
30	Scaf_1102	256612	212.33	1.01075831865569	2n	24657	9.61	1.23	Scaf_1997	212893	350.8	0.990261115031757	2n	9,587	4.5	0.29	Scaf_2807	111760	30.875	0.728012261259137	n	4,393	3.93	0.3	Scaf_2113	213498	127.12	0.920625724217845	2n	4,643	2.17	0.29	Scaf_2862	113148	59.395	1.01322074377346	2n	3,879	3.43	0.19	Scaf_1632	129132	71.17	0.992746547635653	2n	963	0.75	0.09	Scaf_964
31	Scaf_1101	251413	210.26	1.00090446041796	2n	11722	4.66	0.58	Scaf_1996	210508	480.54	1.35649964714185	3n	10,213	4.85	0.31	Scaf_2806	111718	41.785	0.985262909691111	2n	2,792	2.5	0.19	Scaf_2112	205076	190	1.37601390498262	3n	4,254	2.07	0.26	Scaf_2861	112015	56.5	0.963834868645514	2n	7,995	7.14	0.39	Scaf_1631	128045	71.36	0.995396847538011	2n	2,042	1.59	0.18	Scaf_963
32	Scaf_1100	250853	207.79	0.989146474984529	2n	4294	1.71	0.21	Scaf_1995	209830	348.92	0.984954128440367	2n	6,444	3.07	0.2	Scaf_2805	111438	43.52	1.02617307238859	2n	8,628	7.74	0.6	Scaf_2111	204715	189.45	1.37203070683662	3n	4,926	2.41	0.31	Scaf_2860	111988	59.455	1.01424428522689	2n	6,093	5.44	0.29	Scaf_1630	125926	73.635	1.02713070163203	2n	5,018	3.98	0.45	Scaf_962
33	Scaf_1099	250400	316.39	1.50611700861618	3n	16482	6.58	0.82	Scaf_1994	204088	338.55	0.955681016231475	2n	3,832	1.88	0.12	Scaf_2804	109080	40.35	0.951426550341901	2n	2,534	2.32	0.17	Scaf_2110	193874	123.38	0.893539976825029	2n	1,878	0.97	0.12	Scaf_2859	110819	56.55	0.964687819856704	2n	3,824	3.45	0.18	Scaf_1629	125702	71.355	0.995327102803738	2n	2,698	2.15	0.24	Scaf_961
34	Scaf_1098	247241	203.535	0.968891321940306	2n	6008	2.43	0.3	Scaf_1993	199978	358.98	1.01335215243472	2n	29,539	14.77	0.9	Scaf_2803	108938	32.32	0.762084414053289	2n	2,421	2.22	0.17	Scaf_2109	191815	134.68	0.975376593279258	2n	3,667	1.91	0.23	Scaf_2858	105757	60.595	1.03369157284203	2n	4,603	4.35	0.22	Scaf_1628	123395	70.82	0.987864416236574	2n	763	0.62	0.07	Scaf_960
35	Scaf_1097	245202	205.73	0.979340219926691	2n	4761	1.94	0.24	Scaf_1992	198126	346.2	0.9772759350741	2n	3,906	1.97	0.12	Scaf_2802	108798	42.21	0.995284131101155	2n	2,656	2.44	0.18	Scaf_2108	189105	177.86	1.28809385863268	3n	2,247	1.19	0.14	Scaf_2857	105348	57.865	0.98712043671102	2n	4,589	4.36	0.22	Scaf_1627	117969	70.14	0.978379132375506	2n	1,709	1.45	0.15	Scaf_959
36	Scaf_1096	244044	206.16	0.981387156662065	2n	6955	2.85	0.35	Scaf_1991	191329	351.28	0.991616090331687	2n	5,379	2.81	0.16	Scaf_2801	108240	40.4	0.952605517566612	2n	3,227	2.98	0.22	Scaf_2107	187134	129.855	0.940433082271147	2n	2,496	1.33	0.16	Scaf_2856	104770	65.08	1.11020129648584	2n	6,970	6.65	0.34	Scaf_1626	114495	73.64	1.0272004463663	2n	5,940	5.19	0.54	Scaf_958
37	Scaf_1095	240365	203	0.966344551816061	2n	6140	2.55	0.31	Scaf_1990	189178	347.61	0.981256175017643	2n	7,262	3.84	0.22	Scaf_2800	106213	44.17	1.04149964630983	2n	5,328	5.02	0.37	Scaf_2106	185486	129.19	0.935617033603708	2n	3,117	1.68	0.19	Scaf_2855	100312	60.34	1.02934152166496	2n	5,041	5.03	0.24	Scaf_1625	111684	72.335	1.00899707072116	2n	3,011	2.7	0.27	Scaf_957
38	Scaf_1094	237357	222.605	1.05967058599514	2n	9814	4.13	0.49	Scaf_1989	186340	355.48	1.00347212420607	2n	12,368	6.64	0.38	Scaf_2799	105625	42.425	1.00035369016741	2n	5,910	5.6	0.41	Scaf_2105	185059	137.825	0.998153244495944	2n	2,910	1.57	0.18	Scaf_2854	100134	59.17	1.0093824633231	2n	4,017	4.01	0.19	Scaf_1624	109607	73.09	1.01952852559632	2n	5,396	4.92	0.49	Scaf_956
39	Scaf_1093	235858	210.475	1.00192792878564	2n	11483	4.87	0.57	Scaf_1988	184418	514.01	1.45098094565984	3n	9,987	5.42	0.3	Scaf_2798	104110	34.07	0.80334826691818	2n	3,183	3.06	0.22	Scaf_2104	179728	131.65	0.953432792584009	2n	5,853	3.26	0.36	Scaf_2853	97283	58.51	0.99812350733538	2n	6,494	6.68	0.31	Scaf_1623	109445	71.225	0.993513739712652	2n	8,932	8.16	0.81	Scaf_955
40	Scaf_1092	231892	196.71	0.936402151663731	2n	11062	4.77	0.55	Scaf_1987	181162	376.605	1.063105151729	2n	13,893	7.67	0.42	Scaf_2797	102162	44.04	1.03843433152558	2n	3,640	3.56	0.25	Scaf_2103	179240	145.195	1.05152809965238	2n	6,842	3.82	0.43	Scaf_2852	96468	55.57	0.947969976117366	2n	6,135	6.36	0.3	Scaf_1622	108045	72.11	1.0058585576789	2n	3,176	2.94	0.29	Scaf_954
41	Scaf_1091	231039	337.565	1.60691674203837	3n	19098	8.27	0.95	Scaf_1986	181081	342.805	0.967692307692308	2n	5,050	2.79	0.15	Scaf_2796	102017	42.72	1.00730959679321	2n	3,418	3.35	0.24	Scaf_2102	177355	154.23	1.11696118192352	2n	5,754	3.24	0.36	Scaf_2851	96112	58	0.989423404981235	2n	1,898	1.97	0.09	Scaf_1621	106803	72.34	1.00906681545543	2n	4,644	4.35	0.42	Scaf_953
42	Scaf_1090	229981	203.71	0.969724377588423	2n	13257	5.76	0.66	Scaf_1985	179912	343.645	0.970063514467184	2n	10,634	5.91	0.32	Scaf_2795	101854	43.05	1.0150907804763	2n	3,713	3.65	0.26	Scaf_2101	176559	146.69	1.06235515643105	2n	5,474	3.1	0.34	Scaf_2850	95323	60.655	1.03471511429546	2n	5,006	5.25	0.24	Scaf_1620	105842	71.175	0.992816292369926	2n	779	0.74	0.07	Scaf_952
43	Scaf_1089	222453	204.98	0.97576998143476	2n	9152	4.11	0.46	Scaf_1984	177992	361.725	1.02110091743119	2n	7,158	4.02	0.22	Scaf_2794	101601	43.245	1.01968875265268	2n	2,206	2.17	0.15	Scaf_2100	176250	135	0.977694090382387	2n	7,653	4.34	0.48	Scaf_2849	91235	60.405	1.03045035823951	2n	6,458	7.08	0.31	Scaf_1619	105690	70.14	0.978379132375506	2n	1,468	1.39	0.13	Scaf_951
44	Scaf_1088	215600	199.445	0.949421621364307	2n	7960	3.69	0.4	Scaf_1983	177408	364.165	1.02798870853917	2n	11,521	6.49	0.35	Scaf_2793	96311	42.56	1.00353690167413	2n	1,720	1.79	0.12	Scaf_2099	172015	140.91	1.02049536500579	2n	8,118	4.72	0.5	Scaf_2848	90927	57.36	0.978505629477994	2n	3,912	4.3	0.19	Scaf_1618	103265	70.945	0.989608034593388	2n	1,562	1.51	0.14	Scaf_950
45	Scaf_1087	213719	110.02	0.52373018517637	n	16117	7.54	0.8	Scaf_1982	176519	481.4	1.35892731122089	3n	9,281	5.26	0.28	Scaf_2792	96132	31.45	0.741570384343315	n	3,889	4.05	0.27	Scaf_2098	170349	146.37	1.06003765932793	2n	6,254	3.67	0.39	Scaf_2847	90410	58.96	1.0058000682361	2n	4,847	5.36	0.23	Scaf_1617	102223	73.33	1.0228762728414	2n	3,195	3.13	0.29	Scaf_949
46	Scaf_1086	212144	208.04	0.990336554481839	2n	24180	11.4	1.2	Scaf_1981	172867	343.26	0.968976711362032	2n	5,077	2.94	0.15	Scaf_2791	95815	53.545	1.26255600094317	3n	3,231	3.37	0.22	Scaf_2097	165738	133.23	0.964875434530707	2n	4,197	2.53	0.26	Scaf_2846	90238	60.12	1.02558853633572	2n	3,488	3.87	0.17	Scaf_1616	101381	69.965	0.975938066675966	2n	566	0.56	0.05	Scaf_948
47	Scaf_1085	205605	209.525	0.997405626695863	2n	8568	4.17	0.43	Scaf_1980	169240	378.38	1.06811573747354	2n	13,269	7.84	0.4	Scaf_2790	95031	43.97	1.03678377741099	2n	3,887	4.09	0.27	Scaf_2096	165365	186.185	1.34838499420626	3n	11,373	6.88	0.71	Scaf_2845	89922	57.53	0.981405663596042	2n	5,125	5.7	0.25	Scaf_1615	100544	72.09	1.00557957874181	2n	2,211	2.2	0.2	Scaf_947
48	Scaf_1084	199298	222.685	1.06005141143428	2n	12522	6.28	0.62	Scaf_1979	167630	372.385	1.05119266055046	2n	38,808	23.15	1.18	Scaf_2789	93985	40.98	0.966281537373261	2n	2,458	2.62	0.17	Scaf_2095	162624	132.27	0.957922943221321	2n	4,435	2.73	0.28	Scaf_2844	89503	57.29	0.977311497782327	2n	3,180	3.55	0.15	Scaf_1614	99751	71.975	1.00397544985354	2n	5,289	5.3	0.48	Scaf_946
49	Scaf_1083	193217	369.65	1.75965154472319	4n	9736	5.04	0.49	Scaf_1978	166035	353.83	0.998814396612562	2n	9,578	5.77	0.29	Scaf_2788	92424	40.05	0.944352746993634	2n	2,651	2.87	0.18	Scaf_2094	162276	149.58	1.08328505214368	2n	2,862	1.76	0.18	Scaf_2843	88704	59.05	1.00733538041624	2n	4,492	5.06	0.22	Scaf_1613	98339	71.54	0.997907657971823	2n	2,615	2.66	0.24	Scaf_945
50	Scaf_1082	191602	212.12	1.00975865187795	2n	16639	8.68	0.83	Scaf_1977	164788	351.43	0.992039520112915	2n	8,307	5.04	0.25	Scaf_2787	92003	44.11	1.04008488564018	2n	3,515	3.82	0.24	Scaf_2093	160859	143.02	1.03577636152955	2n	8,385	5.21	0.52	Scaf_2842	87811	60.035	1.0241385192767	2n	3,486	3.97	0.17	Scaf_1612	95759	73.455	1.02461989119821	2n	4,768	4.98	0.43	Scaf_944
Percentage of repeats on 50 longest scaffolds out of all repeats identified genome-wide, %								34.2								19.39								16.82								24.22								16.47								16.21
[truncated: 119 more columns]
